# Supplementary material for: AgNO3 as nitrogen source for rhodium(iii)-catalyzed synthesis of 2-aryl-2H-benzotriazoles from azobenzenes
Source: Royal Society of Chemistry journal article supplement (doi:10.1039/c6cc04341k), 2016-01-01

## Supporting Information for

### **AgNO<sub>3</sub> as Nitrogen Source for Rhodium(III)-Catalyzed Synthesis of 2-Aryl-2*H*-Benzotriazoles from Azobenzenes**

Jixing Li,<sup>ab</sup> Hui Zhou,<sup>ab</sup> Jinlong Zhang,<sup>a</sup> Huameng Yang,<sup>a</sup> and Gaoxi Jiang<sup>\*a</sup>

<sup>a</sup> State Key Laboratory for Oxo Synthesis and Selective Oxidation, Suzhou Research Institute of LICP, Lanzhou Institute of Chemical Physics (LICP), Chinese Academy of Sciences, Lanzhou 730000, P. R. China

<sup>b</sup> University of Chinese Academy of Science, Beijing 100049, P. R. China

#### **Table of Contents**

|   |                                                                 |     |
|---|-----------------------------------------------------------------|-----|
| 1 | General experimental information                                | S2  |
| 2 | General procedures for the synthesis of azobenzenes <b>1</b>    | S3  |
| 3 | Details of optimization for the reaction conditions             | S5  |
| 4 | Experimental characterization data for azobenzenes              | S7  |
| 5 | General procedures for the synthesis of products <b>2</b>       | S11 |
| 6 | Experiment for Isotopic Tracer Experiments                      | S11 |
| 7 | Experimental characterization data for products                 | S12 |
| 8 | <sup>1</sup> H and <sup>13</sup> C NMR spectra for all products | S19 |

## 1 General experimental information

**Experimental:** All reactions were set up under inert atmosphere (argon or N<sub>2</sub>) utilizing glassware that was flame-dried and cooled under vacuum. All non-aqueous manipulations were using standard Schlenk techniques. Reactions were monitored using thin-layer chromatography (TLC) on Silica Gel plates. Visualization of the developed plates was performed under UV light (254 nm) or KMnO<sub>4</sub> stain. Silica Gel Flash Column Chromatography was performed on SYNTHWARE 40-63µm silica gel.

**Materials:** Unless otherwise indicated, starting catalysts and materials were obtained from Sigma Aldrich, TCI, Alfa Aesar, or Acros Co. Ltd. Moreover, commercially available reagents were used without additional purification.

**Instrumentation:** All NMR spectra were run at 400 MHz (<sup>1</sup>H NMR) or 100 MHz (<sup>13</sup>C NMR) or 377 MHz (<sup>19</sup>F NMR) in CDCl<sub>3</sub> or d<sub>6</sub>-DMSO solution. <sup>1</sup>H NMR spectra were internally referenced to TMS. <sup>13</sup>C NMR spectra were internally referenced to the residual solvent signal. Data for <sup>1</sup>H NMR are reported as follows: chemical shift (δppm), multiplicity (s = singlet, d = doublet, t = triplet, q = quartet, m = multiplet, br = broad), coupling constants (*J*) were reported in Hz. High resolution mass spectra (HRMS) were recorded on Bruker MicrOTOF-Q II mass instrument (ESI).

## 2 General procedures for preparation of azobenzenes 1

A mixture of CuBr (4.2 mg, 0.03 mmol), pyridine (8.7 mg, 0.09 mmol), and aromatic amine (93 mg, 1 mmol) added in toluene (4 mL) under air (1 atm). The reaction mixture was vigorously stirred at 60 °C for 24 h. After cooling down to room temperature and concentrating in vacuum, the residue was purified by flash chromatography with petroleum ether to provide the azo derivative.<sup>[1]</sup>

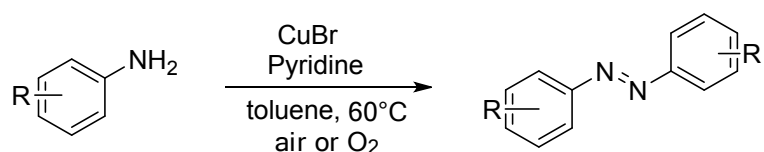

The mixture of CuBr (2.9 mg, 0.02 mmol), pyridine (4.8 mg, 0.06 mmol), aniline (93 mg, 1 mmol) and 4-methoxybenzenamine (0.2 mmol) in toluene (4 mL) was vigorously stirred at 60 °C under O<sub>2</sub> (1 atm) for 24 h. Then cooling down to room temperature and concentrating in vacuum, the residue was purified by flash chromatography on silica gel (eluent: petroleum ether/ethyl acetate = 200:1) to afford the azo derivatives.<sup>[1]</sup>

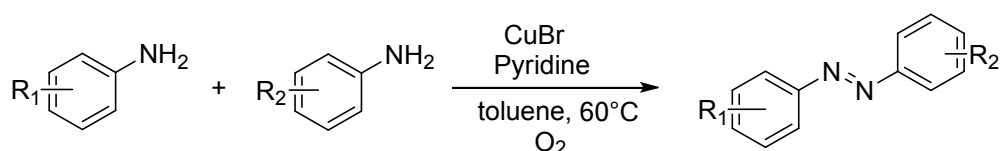

To a round bottom flask equipped with a stir bar was combined the indicated aniline (12.0 mmol, 1.2 equiv) and nitrosobenzene (1.07 g, 10.0 mmol, 1.0 equiv) in glacial acetic acid (100 mL) as solvent. The flask was covered with aluminum foil, and the reaction mixture was stirred at room temperature for 48 h. The reaction mixture was extracted with hexanes and was transferred to a separatory funnel with water. The organic layer was collected and washed with water, then dried with MgSO<sub>4</sub>, and

concentrated. Purification by chromatography with hexanes/ethyl acetate afforded the azobenzenes.<sup>[2]</sup>

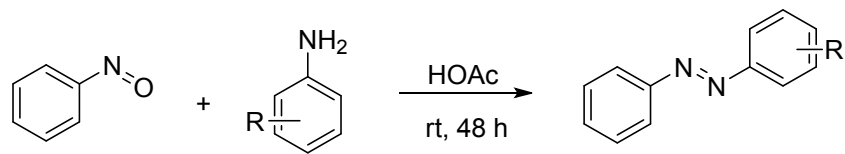

### 3 Details of optimization for the reaction conditions

The reaction mixture was added to a flame-dried Schlenk tube which charged with a magnetic stir bar. The resulting suspension was stirred at specific temperature under N<sub>2</sub> for 12 h. After celite filtration and evaporation of the solvents in vacuo, the crude product was purified by column chromatography on silica gel (petroleum and ethyl acetate=100:1) to yield products.

Table 1: optimization of the reaction conditions

| <b>1a</b>       |                                   |                                 |                                 | <b>2a</b>              |
|-----------------|-----------------------------------|---------------------------------|---------------------------------|------------------------|
| entry           | “N” source                        | [X <sup>-</sup> ]               | solvent                         | yield (%) <sup>b</sup> |
| 1               | AgNO <sub>3</sub>                 | AgNTf <sub>2</sub>              | CH <sub>2</sub> Cl <sub>2</sub> | 52(42)                 |
| 2               | AgNO <sub>3</sub>                 | AgNTf <sub>2</sub>              | DCE                             | 88(73)                 |
| 3               | AgNO <sub>3</sub>                 | AgNTf <sub>2</sub>              | Toluene                         | n.r. <sup>c</sup>      |
| 4               | AgNO <sub>3</sub>                 | AgNTf <sub>2</sub>              | THF                             | n.r.                   |
| 5               | AgNO <sub>3</sub>                 | AgNTf <sub>2</sub>              | DMF                             | n.r.                   |
| 6               | AgNO <sub>3</sub>                 | AgNTf <sub>2</sub>              | PhNO <sub>3</sub>               | 25                     |
| 7               | AgNO <sub>3</sub>                 | AgNTf <sub>2</sub>              | CH <sub>3</sub> NO <sub>2</sub> | 47                     |
| 8               | KNO <sub>3</sub>                  | AgNTf <sub>2</sub>              | DCE                             | (39)                   |
| 9               | Mg(NO <sub>3</sub> ) <sub>2</sub> | AgNTf <sub>2</sub>              | DCE                             | 45                     |
| 10              | Zn(NO <sub>3</sub> ) <sub>2</sub> | AgNTf <sub>2</sub>              | DCE                             | 72(58)                 |
| 11              | Co(NO <sub>3</sub> ) <sub>2</sub> | AgNTf <sub>2</sub>              | DCE                             | 70                     |
| 12              | Ni(NO <sub>3</sub> ) <sub>2</sub> | AgNTf <sub>2</sub>              | DCE                             | 35                     |
| 13              | Cu(NO <sub>3</sub> ) <sub>2</sub> | AgNTf <sub>2</sub>              | DCE                             | 20                     |
| 14              | CH <sub>3</sub> NO <sub>2</sub>   | AgNTf <sub>2</sub>              | DCE                             | 48                     |
| 15              | AgNO <sub>3</sub>                 | AgOTf                           | DCE                             | 68                     |
| 16              | AgNO <sub>3</sub>                 | AgSbF <sub>6</sub>              | DCE                             | 35                     |
| 17              | AgNO <sub>3</sub>                 | AgBF <sub>4</sub>               | DCE                             | 50                     |
| 18              | AgNO <sub>3</sub>                 | Ag <sub>2</sub> CO <sub>3</sub> | DCE                             | n.r.                   |
| 19              | AgNO <sub>3</sub>                 | NaOTf                           | DCE                             | 30                     |
| 20              | AgNO <sub>3</sub>                 | NaBARF                          | DCE                             | 50                     |
| 21 <sup>d</sup> | AgNO <sub>3</sub>                 | AgNTf <sub>2</sub>              | DCE                             | (67)                   |
| 22 <sup>e</sup> | AgNO <sub>3</sub>                 | AgNTf <sub>2</sub>              | DCE                             | (45)                   |

<sup>a</sup>Unless otherwise noted, the reaction was performed with **1a** (0.1 mmol), “N” source (0.2 mmol), [Cp\*RhCl<sub>2</sub>]<sub>2</sub> (5.0 mol %), counteranion additive [X<sup>-</sup>] (20 mol %), and H<sub>2</sub>O (0.1 mmol) in 0.5 mL of solvent under 150 °C for 12 hours. <sup>b</sup>Yield was determined by GC-Mass using a standard, yield of isolated product is given in parentheses. <sup>c</sup>n.r means no reaction upon **1a**. <sup>d</sup>1.0 eq of AgNO<sub>3</sub> used. <sup>e</sup>Reaction carried out at 140 °C.

Table 2: The effect of different catalysts

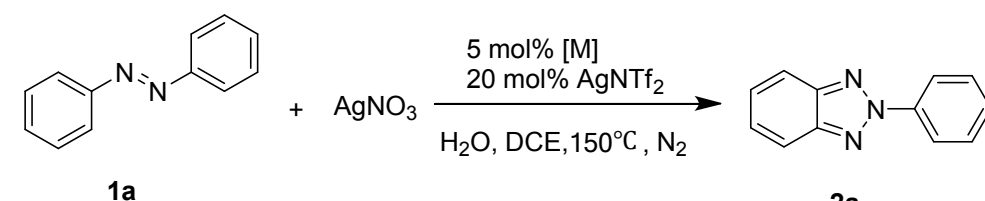

| Entry <sup>a</sup> | [M]                                                   | yield <sup>b</sup> |
|--------------------|-------------------------------------------------------|--------------------|
| 1                  | [Cp*IrCl <sub>2</sub> ] <sub>2</sub>                  | NR <sup>c</sup>    |
| 2                  | Cp*Ru(PPh <sub>3</sub> ) <sub>2</sub> Cl <sub>2</sub> | NR <sup>c</sup>    |
| 3                  | Pd(OAc) <sub>2</sub>                                  | NR <sup>c</sup>    |
| 4                  | [Ir(cod)Cl] <sub>2</sub>                              | NR <sup>c</sup>    |
| 5                  | [Cp*RhCl <sub>2</sub> ] <sub>2</sub>                  | 73%                |

<sup>a</sup>Reaction conditions: **1a** (0.1 mmol), AgNO<sub>3</sub>(0.2 mmol), [M] (5 mol %), AgNTf<sub>2</sub> (20 mol%), DCE (1 mL), 150 °C, 12 h. <sup>b</sup> isolated yield. <sup>c</sup> N.R. means no reaction.

Table 2: The effect of the loading of AgNO<sub>3</sub>

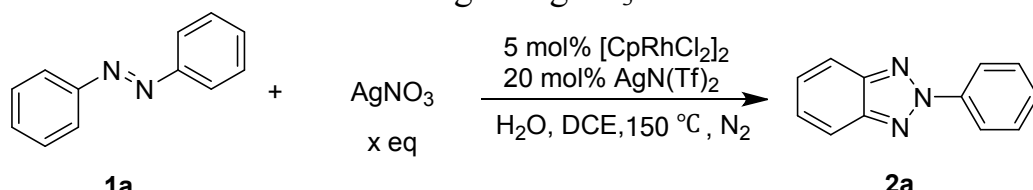

| Entry <sup>a</sup> | x   | yield(%) <sup>b</sup> |
|--------------------|-----|-----------------------|
| 1                  | 1   | 67                    |
| 2                  | 1.5 | 62                    |
| 3                  | 2   | 73                    |
| 4                  | 2.2 | 69                    |

<sup>a</sup>Reaction conditions: **1a** (0.1 mmol), AgNO<sub>3</sub> (x mmol), [Cp\*RhCl<sub>2</sub>]<sub>2</sub> (5 mol %), AgN(Tf)<sub>2</sub>(20 mol %), 1 eq H<sub>2</sub>O, DCE(1mL), N<sub>2</sub>, 150 °C, 12 h. <sup>b</sup> isolated yield.

Table 3: The effect of the reaction temperature

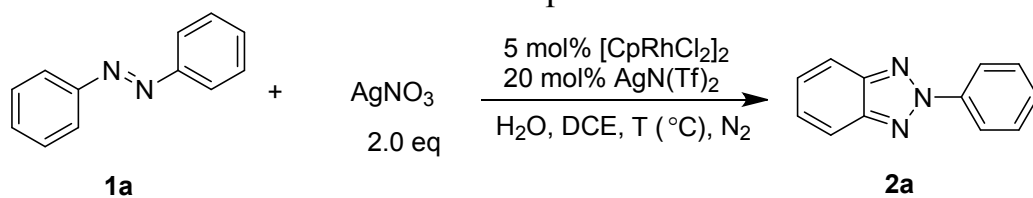

| Entry <sup>a</sup> | T(°C) | yield(%) <sup>b</sup> |
|--------------------|-------|-----------------------|
| 1                  | 160   | 70                    |
| 2                  | 150   | 73                    |
| 3                  | 140   | trace                 |

<sup>a</sup>Reaction conditions: **1a** (0.1 mmol), AgNO<sub>3</sub> (0.4 mmol), [Cp\*RhCl<sub>2</sub>]<sub>2</sub> (5 mol %), AgN(Tf)<sub>2</sub> (20 mol %) ,1 eq H<sub>2</sub>O, DCE (1 mL), N<sub>2</sub>, T °C, 12 h. <sup>b</sup> isolated yield .

#### 4 Experimental characterization data for azobenzenes

(*E*)-1,2-Diphenyldiazene (**1a**).<sup>[1]</sup>

<sup>1</sup>H NMR (CDCl<sub>3</sub>, 400 MHz): δ= 7.93-7.91 (m, 4H), 7.52-7.44 (m, 6H);

<sup>13</sup>C NMR (CDCl<sub>3</sub>, 100 MHz): δ= 152.7, 131.0, 129.1, 122.8.

(*E*)-1, 2-Di-*p*-tolylidiazene (**1b**)<sup>[1]</sup>:

<sup>1</sup>H NMR (400 MHz, CDCl<sub>3</sub>) δ 7.81 (d, *J* = 8 Hz, 4H), 7.30 (d, *J* = 8 Hz,

4H), 2.42 (s, 6H); <sup>13</sup>C NMR (100 MHz, CDCl<sub>3</sub>) δ ppm 150.88, 141.2,

129.7, 122.7, 21.5.

(*E*)-Bis(4-ethylphenyl)diazene (**1c**)<sup>[1]</sup>:

<sup>1</sup>H NMR (400 MHz, CDCl<sub>3</sub>) δ 7.9(d, *J* =8 Hz, 4H), 7.37(d, *J* =8 Hz, 4H),

2.79-2.73(q, *J* =7.6 Hz, 4H), 1.32(t, *J* =7.6 Hz, 6H); <sup>13</sup>C NMR (100 MHz,

CDCl<sub>3</sub>) δ 151.1, 147.5, 128.5, 122.8, 28.8, 15.5.

(*E*)-Bis( 4-*n*-butylphenyl)diazene (**1d**)<sup>[1]</sup>:

<sup>1</sup>H NMR (400 MHz, CDCl<sub>3</sub>) δ 7.89 (d, *J* = 8.0 Hz, 4H), 7.35 (d, *J* = 8.0 Hz, 4H), 2.72 (t, 4H), 1.72-1.65 (m, 4H), 1.47-1.38 (m, 4H), 0.99 (t, 6H).

<sup>13</sup>C NMR (100 MHz, CDCl<sub>3</sub>) δ 151.1, 146.2, 129.1, 122.8, 35.6, 33.5, 22.4, 14.0.

(*E*)-Bis(4-isopropylphenyl)diazene (**1e**)<sup>[1]</sup>:

<sup>1</sup>H NMR (400 MHz, CDCl<sub>3</sub>) δ 7.93(d, *J* = 8.0 Hz, 4H), 7.42(d, *J* = 8.0 Hz, 4H), 3.06-3.03 (m, 2H), 1.36(d, *J* = 8 Hz, 12H); <sup>13</sup>C NMR (100 MHz,

CDCl<sub>3</sub>) δ = 152.0, 151.2, 127.1, 122.8, 34.1, 23.9.

(*E*)-Bis(4-*t*-butylphenyl)diazene (**1f**)<sup>[1]</sup>:

<sup>1</sup>H NMR (400 MHz, CDCl<sub>3</sub>) δ 7.93(d, *J* =8.0 Hz, 4H), 7.59 (d, *J* =8.0 Hz,

4H), 1.44(s, 18H);  $^{13}\text{C}$  NMR (100 MHz,  $\text{CDCl}_3$ )  $\delta = 154.2, 150.8, 126.0, 122.5, 35.0, 31.3$ .

(*E*)-Bis(4-chlorophenyl)diazene (**1g**)<sup>[2]</sup>:

$^1\text{H}$  NMR ( $\text{CDCl}_3$ , 400 MHz):  $\delta = 7.68$  (d,  $J = 8$  Hz, 4H), 7.21 (d,  $J = 8$  Hz, 4H);  $^{13}\text{C}$  NMR ( $\text{CDCl}_3$ , 100 MHz):  $\delta = 151.1, 137.4, 129.6, 124.5$ .

(*E*)-Bis(4-bromophenyl)diazene (**1h**)<sup>[2]</sup>:

$^1\text{H}$  NMR (400 MHz,  $\text{CDCl}_3$ )  $\delta$  7.79(d,  $J = 8.0$  Hz, 4H), 7.63 (d,  $J = 8.0$  Hz, 4H);  $^{13}\text{C}$  NMR (100 MHz,  $\text{CDCl}_3$ )  $\delta = 150.8, 141.2, 129.7, 122.7$ .

(*E*)-diethyl4,4'-(diazene-1,2-diyl)dibenzoate (**1i**)<sup>[2]</sup>:

$^1\text{H}$  NMR ( $\text{CDCl}_3$ , 400 MHz):  $\delta = 8.20$  (d,  $J = 8$  Hz, 4H), 7.97 (d,  $J = 8$  Hz, 4H), 4.42(q, 6 H), 1.43(t, 4 H);  $^{13}\text{C}$  NMR ( $\text{CDCl}_3$ , 100 MHz):  $\delta = 165.88, 154.8, 132.7, 130.6, 122.8, 61.3, 14.3$ .

(*E*)-1,2-Di-*o*-tolylidiazene (**1j**)<sup>[1]</sup>:

$^1\text{H}$  NMR (400 MHz,  $\text{CDCl}_3$ )  $\delta$  7.70(d,  $J = 8.0$  Hz, 4H), 7.38-7.41 (m, 4H), 7.30-7.34 (m, 2H), 2.81(s, 6H);  $^{13}\text{C}$  NMR (100 MHz,  $\text{CDCl}_3$ )  $\delta = 151.1, 138.1, 131.3, 130.7, 126.4, 115.9, 17.7$ .

(*E*)-Bis(3,4-dimethylphenyl)diazene (**1k**)<sup>[1]</sup>:

$^1\text{H}$  NMR ( $\text{CDCl}_3$ , 400 MHz):  $\delta = 7.74 - 7.70$  (m, 4H), 7.30 (d,  $J = 8.0$  Hz, 2H), 2.39 (d,  $J = 12.0$  Hz, 6H);  $^{13}\text{C}$  NMR ( $\text{CDCl}_3$ , 100 MHz):  $\delta = 151.3, 139.85, 137.4, 130.3, 123.4, 120.7, 19.9, 19.8$ .

(*E*)-1-phenyl-2-(*p*-tolyl)diazene (**1l**)<sup>[1]</sup>:

$^1\text{H}$  NMR (400 MHz,  $\text{CDCl}_3$ )  $\delta$  7.94 (m, 2H), 7.86 (d,  $J = 8$  Hz, 2H), 7.56



-7.49 (m, 3H), 7.35(d,  $J = 8$  Hz, 2H), 2.46 (s, 3H);  $^{13}\text{C}$  NMR (100 MHz,  $\text{CDCl}_3$ )  $\delta = 152.8, 150.9, 141.6, 130.7, 129.8, 129.1, 122.9, 122.8, 21.5$ .

(*E*)-1-(4-chlorophenyl)-2-phenyldiazene (**1m**)<sup>[2]</sup>:

$^1\text{H}$  NMR ( $\text{CDCl}_3$ , 400 MHz):  $\delta = 7.97-7.90$  (m, 4H), 7.58-7.50 (m, 5H);  $^{13}\text{C}$ NMR ( $\text{CDCl}_3$ , 100 MHz):  $\delta = 152.4, 150.9, 136.9, 131.3, 129.3, 129.1, 124.1, 122.9$ .

(*E*)-4-(phenyldiazenyl)benzotrile (**1n**)<sup>[2]</sup>:

$^1\text{H}$  NMR ( $\text{CDCl}_3$ , 400 MHz):  $\delta = 7.99$  (d,  $J = 8$  Hz, 2H), 7.97-7.94 (m, 2H), 7.81 (d,  $J = 8$  Hz, 2H), 7.57-7.53 (m, 3H);  $^{13}\text{C}$  NMR ( $\text{CDCl}_3$ , 100 MHz):  $\delta = 154.5, 152.3, 133.2, 132.2, 129.3, 123.33, 123.29, 118.5, 113.9$ .

(*E*)-1-(3,5-dimethylphenyl)-2-phenyldiazene(**1o**)<sup>[2]</sup>:

$^1\text{H}$  NMR ( $\text{CDCl}_3$ , 400 MHz):  $\delta = 8.06-8.04$  (m, 2H), 7.74 (d,  $J = 8.0\text{Hz}$ , 1H), 7.62-7.53 (m, 3H), 7.23(s, 1H), 7.17 (d,  $J = 8.0\text{Hz}$ , 1H), 2.83(s, 3H), 2.47(s, 3H);  $^{13}\text{C}$  NMR ( $\text{CDCl}_3$ , 100 MHz):  $\delta = 166.6, 153.2, 148.8, 141.4, 138.4, 131.9, 130.6, 129.1, 127.3, 122.9, 115.4, 21.5, 17.6$ .

(*E*)-1,2-Di-*m*-tolylidiazene (**1p**)<sup>[1]</sup>:

$^1\text{H}$  NMR ( $\text{CDCl}_3$ , 400 MHz):  $\delta = 7.81-7.79$  (m, 4H), 7.45 (t,  $J = 8.0$  Hz, 2H), 7.33 (d,  $J = 8.0$  Hz, 2H), 2.51 (s, 6H);  $^{13}\text{C}$ NMR ( $\text{CDCl}_3$ , 100 MHz):  $\delta = 152.8, 139.0, 131.7, 128.9, 122.9, 120.5, 21.4$ .

(*E*)-1,2-bis(3-isopropylphenyl)diazene(**1q**)<sup>[1]</sup>:

$^1\text{H}$  NMR ( $\text{CDCl}_3$ , 400 MHz):  $\delta = 7.97$  (s, 2H), 7.90 (d,  $J = 8.0$  Hz, 2H), 7.55 (t,  $J = 8.0$  Hz, 2H), 7.46 (d,  $J = 8.0$  Hz, 6H), 3.12-3.17(q, 2H), 1.46 (d, 6H);  $^{13}\text{C}$ NMR ( $\text{CDCl}_3$ , 100 MHz):  $\delta = 153.0, 150.0, 129.3, 129.1,$

121.1, 121.1, 121.1, 120.3, 34.2, 24.1.

(*E*)-1-(2-nitrophenyl)-2-phenyldiazene(**1r**)<sup>[3]</sup>:

<sup>1</sup>H NMR (CDCl<sub>3</sub>, 400 MHz): δ= 7.97-7.91(m, 3H), 7.71-7.68 (m, 2H), 7.62-7.56 (m, 4H); <sup>13</sup>C NMR (CDCl<sub>3</sub>, 100 MHz): δ= 152.5, 147.5, 145.5, 133.1, 132.3, 130.4, 129.3, 124.1, 123.6, 118.5.

## 5 General procedures for the synthesis of products 2

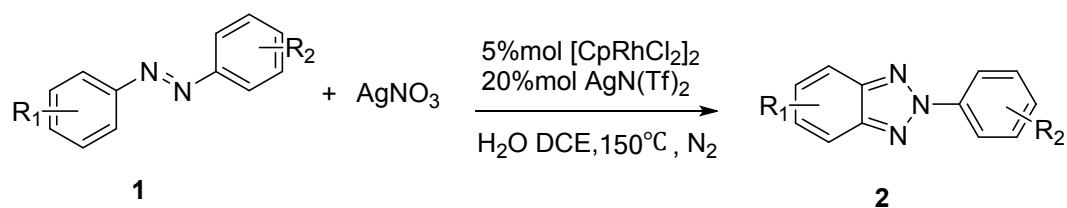

azobenzenes **1** (0.3 mmol), AgNO<sub>3</sub> (0.6 mmol), [Cp\*RhCl<sub>2</sub>]<sub>2</sub> (5 mol %), AgN(Tf)<sub>2</sub> (20 mol %) and 1 eq H<sub>2</sub>O was added to a flame-dried Schlenk tube which charged with a magnetic stir bar in 1.5 mL DCE. The resulting suspension was stirred at 150°C under N<sub>2</sub> for 12 h. After celite filtration and evaporation of the solvents in vacuo, the crude product was purified by column chromatography on silica gel (petroleum and ethyl acetate = 100:1) to yield products **2**.

## 6 Experimental for Isotopic Tracer Experiments

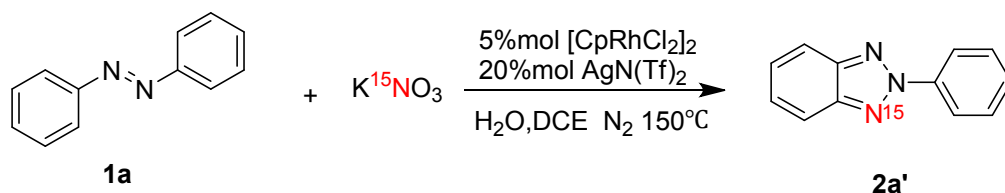

azobenzenes **1** (0.3 mmol), K<sup>15</sup>NO<sub>3</sub> (0.6 mmol), [Cp\*RhCl<sub>2</sub>]<sub>2</sub> (5 mol %), AgN(Tf)<sub>2</sub> (20 mol %) and 1 eq H<sub>2</sub>O was added to a flame-dried Schlenk tube which charged with a magnetic stir bar in 1.5 mL DCE. The resulting suspension was stirred at 150°C under N<sub>2</sub> for 12 h. After celite filtration and evaporation of the solvents in vacuo, the crude product was purified by column chromatography on silica gel (petroleum and ethyl acetate = 100:1) to yield products **2a'**.

## 7 Experimental characterization data for products **2**

2-Phenyl-2Hbenzo[d][1,2,3]triazole (**2a**):

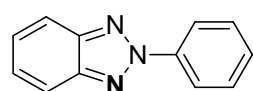

The title compound was prepared according to the general procedure as a yellow solid. <sup>1</sup>H NMR (400 MHz, CDCl<sub>3</sub>) δ= 8.38-8.36 (m, 2H), 7.94- 7.92 (m, 2H), 7.54-7.50 (m,

2H), 7.43-7.37 (m, 3H);  $^{13}\text{C}$  NMR (100 MHz,  $\text{CDCl}_3$ )  $\delta$ = 145.0, 129.4, 128.9, 127.1, 120.6, 118.4; HRMS (ESI) calcd. for  $\text{C}_{12}\text{H}_9\text{N}_3$  [ $\text{M}^+$ ]: 195.0796, found: 195.0816

5-Methyl-2-(p-tolyl)-2H-benzo[d][1,2,3]triazole (**2b**):

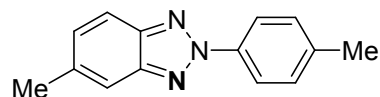

The title compound was prepared according to the general procedure as a white solid.  $^1\text{H}$ NMR ( $\text{CDCl}_3$ , 400 MHz):  $\delta$ =8.20 (d, 2H,  $J$  = 8.4 Hz), 7.90 (d,  $J$  = 8Hz, 1H), 7.66 (s, 1H), 7.33 (d,  $J$  = 8.4 Hz, 2H), 7.26–7.23 (m, 1H), 2.43 (s, 3H), 2.51 (s, 3H);  $^{13}\text{C}$  NMR ( $\text{CDCl}_3$ , 100 MHz):  $\delta$ =145.6, 143.8, 139.0, 138.4, 137.3, 130.1, 120.5, 117.8, 116.7, 11.4, 21.3; HRMS (ESI) calcd. for  $\text{C}_{14}\text{H}_{13}\text{N}_3$  [ $\text{M}^+$ ]: 223.1109, found: 223.1151.

5-Ethyl-2-(4-ethylphenyl)-2H-benzo[d][1,2,3]triazole (**2c**):

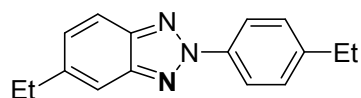

The title compound was prepared according to the general procedure as a white solid.  $^1\text{H}$  NMR (400 MHz,  $\text{CDCl}_3$ )  $\delta$ = 8.26 (d,  $J$  = 8.0 Hz, 2H), 7.96 (d,  $J$  = 8.0 Hz, 1H), 7.71 (s, 1H), 7.38 (d,  $J$  = 8.0 Hz, 2H), 7.31-7.29 (m, 1H), 2.83 (q,  $J$  = 8.0Hz, 2H), 2.76 (q,  $J$  = 8.0 Hz, 2H), 1.37-1.30(m, 6H);  $^{13}\text{C}$  NMR (100 MHz,  $\text{CDCl}_3$ )  $\delta$ =145.4, 143.6, 138.9, 138.2, 137.2, 130.0, 129.9, 120.3, 117.7, 116.5, 29.2, 28.5, 15.5, 15.3; HRMS (ESI) calcd. for  $\text{C}_{16}\text{H}_{17}\text{N}_3$  [ $\text{M}^+$ ]: 251.1422, found: 251.1450.

5-Butyl-2-(4-butylphenyl)-2H-benzo[d][1,2,3]triazole (**2d**):

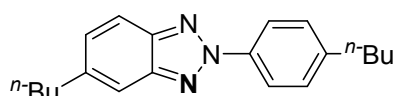

The title compound was prepared according to the general procedure as a reddish liquid.  $^1\text{H}$  NMR ( $\text{CDCl}_3$ , 400 MHz):  $\delta$ = 8.23 (d,  $J$  = 8.0 Hz, 2H), 7.83 (d,  $J$  = 8.0Hz, 1H), 7.67 (s, 1H), 7.34 (d,  $J$  = 8.0 Hz, 2H), , 7.25-7.27 (m, 1H) ,

2.77 (t,  $J = 8.0$  Hz, 2H), 2.68 (t,  $J = 8.0$  Hz, 2H), 1.73-1.67 (m, 4H), 1.30-1.44 (m, 4H), 0.98-0.94 (m, 6H);  $^{13}\text{C}$  NMR ( $\text{CDCl}_3$ , 100 MHz):  $\delta = 145.4$ , 143.8, 142.1, 129.3, 129.3, 120.4, 117.8, 115.9, 36.1, 35.27, 33.46, 33.26, 22.33, 22.29, 13.95, 13.9; HRMS (ESI) calcd. for  $\text{C}_{20}\text{H}_{25}\text{N}_3$  [ $\text{M}^+$ ]: 307.2048, found: 307.2067.

5-Isopropyl-2-(4-isopropylphenyl)-2H-benzo[d][1,2,3]triazole (**2e**):

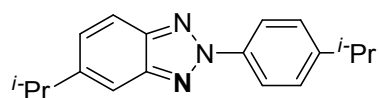

The title compound was prepared according to the general procedure as a light red solid.  $^1\text{H}$  NMR ( $\text{CDCl}_3$ , 400 MHz):  $\delta = 8.24$  (d,  $J = 8.0$  Hz, 2H), 7.85 (d,  $J = 8.0$  Hz, 1H), 7.72 (s, 1H), 7.40 (d,  $J = 8.0$  Hz, 2H), 7.33 (d,  $J = 8.4$  Hz, 1H), 3.07- 2.98 (m, 2H), 1.35 (s, 3H), 1.34 (s, 3H), 1.32 (s, 3H), 1.30 (s, 3H);  $^{13}\text{C}$  NMR ( $\text{CDCl}_3$ , 100 MHz):  $\delta = 149.9$ , 148.3, 145.6, 144.1, 138.6, 128.1, 127.5, 120.6, 118.1, 113.8, 34.7, 34.0, 24.1, 23.9; HRMS (ESI) calcd. for  $\text{C}_{18}\text{H}_{21}\text{N}_3$  [ $\text{M}^+$ ]: 279.1735, found: 279.1750.

5-Tertbutyl-2-(4-tertbutylphenyl)-2H-benzo[d][1,2,3]triazole (**2f**):

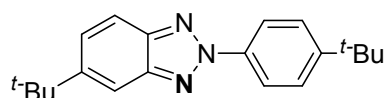

The title compound was prepared according to the general procedure as a yellow solid.  $^1\text{H}$  NMR ( $\text{CDCl}_3$ , 400 MHz):  $\delta = 8.28$ -8.24 (m,  $J = 8.0$  Hz, 2H), 7.97 (m, 2H), 7.58-7.52 (m, 3H), 1.42 (s, 9H), 1.39 (s, 9H);  $^{13}\text{C}$  NMR ( $\text{CDCl}_3$ , 100 MHz):  $\delta = 152.0$ , 150.3, 145.4, 143.5, 126.8, 126.3, 120.1, 117.6, 112.8, 35.3, 34.8, 31.3, 31.1; HRMS (ESI) calcd. for  $\text{C}_{20}\text{H}_{25}\text{N}_3$  [ $\text{M}^+$ ]: 307.2048, found: 307.2059.

5-Chloro-2-(3-chlorophenyl)-2H-benzo[d][1,2,3]triazole (**2g**):

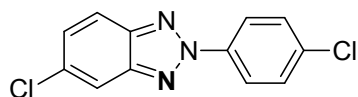

The title compound was prepared according to the general procedure as a white solid;  $^1\text{H}$  NMR

(CDCl<sub>3</sub>, 400 MHz):  $\delta$ = 8.25-8.28 (m, 2H), 7.90 (dd,  $J_1$  = 1.2 Hz,  $J_2$  = 8.0 Hz 1H), 7.85(dd,  $J_1$  = 1.2 Hz,  $J_2$  = 8.0 Hz 1H), 7.54-7.50 (m, 2H), 7.37 (m 1H); <sup>13</sup>C NMR (CDCl<sub>3</sub>, 100 MHz):  $\delta$ = 145.4, 143.6, 135.2, 133.27, 129.7, 129.1, 121.8, 119.6, 117.4; HRMS (ESI) calcd. for C<sub>12</sub>H<sub>7</sub>Cl<sub>2</sub>N<sub>3</sub> [M<sup>+</sup>]: 263.0017, found: 263.0026.

5-Bromo-2-(4-bromophenyl)-2H-benzo[d][1,2,3]triazole (**2h**):

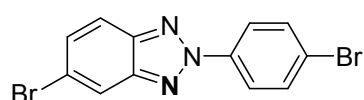

The title compound was prepared according to the general procedure as a brown solid. <sup>1</sup>H NMR (CDCl<sub>3</sub>, 400 MHz):  $\delta$ = 8.22 (d,  $J$  = 8.0 Hz, 2H), 7.90 (d,  $J$  = 12.0 Hz, 1H), 8.10 (s, 1H), 7.69-7.67 (m, 2H), 7.50 (dd,  $J_1$  = 1.2 Hz,  $J_2$  = 8.0 Hz, 1H); <sup>13</sup>C NMR (CDCl<sub>3</sub>, 100 MHz):  $\delta$ = 146.0, 143.7, 134.0, 132.6, 131.4, 123.3, 122.1, 122.0, 121.2, 120.8, 119.8; HRMS (ESI) calcd. for C<sub>12</sub>H<sub>7</sub>Br<sub>2</sub>N<sub>3</sub> [M<sup>+</sup>]: 350.9007, found: 350.9029.

Ethyl 2-(4-(ethoxycarbonyl)phenyl)-2H-benzo[d][1,2,3]triazole-5-carboxylate (**2i**):

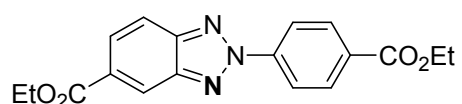

The title compound was prepared according to the general procedure as a white solid. <sup>1</sup>H NMR (400 MHz, CDCl<sub>3</sub>)  $\delta$ = 8.68 (d,  $J$  = 8.0 Hz, 1H), 8.41 (d,  $J$  = 8.0 Hz, 2H), 8.22-8.19 (m, 2H), 8.04 (dd,  $J$  = 8.0 Hz, 1.0 Hz, 1H), 7.93-7.91 (m, 1H), 4.44-4.33 (m, 4H), 1.46-1.41 (m, 3H); <sup>13</sup>C NMR (100 MHz, CDCl<sub>3</sub>)  $\delta$ = 166.0, 165.5, 146.9, 144.7, 143.0, 131.2, 131.0, 129.9, 127.6, 122.9, 122.1, 120.5, 118.4, 61.5, 61.4, 14.3; HRMS (ESI) calcd. for C<sub>18</sub>H<sub>17</sub>N<sub>3</sub>O<sub>4</sub> [M<sup>+</sup>]: 339.1219, found: 339.1236.

4-Methyl-2-(o-tolyl)-2H-benzo[d][1,2,3]triazole (**2j**):

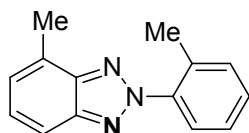

The title compound was prepared according to the

general procedure as a red liquid.  $^1\text{H}$  NMR ( $\text{CDCl}_3$ , 400 MHz):  $\delta$ = 7.79 (d, 1H,  $J$  = 12.0 Hz), 7.70 (d, 1H,  $J$  = 8.0 Hz), 7.33-7.43 (m, 4H), 7.19 (d, 1H,  $J$  = 6.8 Hz), 2.41 (s, 3H), 2.73 (s, 3H);  $^{13}\text{C}$  NMR ( $\text{CDCl}_3$ , 100 MHz):  $\delta$ = 145.3, 144.7, 140.4, 133.5, 131.7, 129.5, 129.52, 129.09, 128.1, 127.1, 126.7, 126.1, 125.8, 115.6, 18.7, 17.2; HRMS (ESI) calcd. for  $\text{C}_{14}\text{H}_{13}\text{N}_3$  [ $\text{M}^+$ ]: 223.1109, found: 223.1136.

2-(3,4-dimethylphenyl)-5,6-dimethyl-2H-benzo[d][1,2,3]triazole(**2k**):

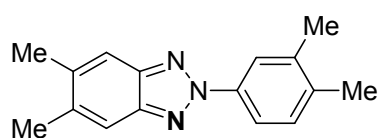

The title compound was prepared according to the general procedure as a white solid.  $^1\text{H}$  NMR (400 MHz,  $\text{CDCl}_3$ )  $\delta$ = 8.11 (s, 1H), 8.03 (dd,  $J_1$  = 8 Hz,  $J_2$  = 3.6, 1H), 7.67 (s, 2H), 7.29 (d,  $J$  = 8.0 Hz, 1H), 2.43 (s, 6H), 2.40 (s, 3H), 2.53 (s, 3H);  $^{13}\text{C}$  NMR (100 MHz,  $\text{CDCl}_3$ )  $\delta$  = 144.4, 137.5, 130.4, 121.3, 117.7, 116.6, 21.0, 19.9, 19.5; HRMS (ESI) calcd. for  $\text{C}_{16}\text{H}_{17}\text{N}_3$  [ $\text{M}^+$ ]: 251.1422, found: 251.1446.

2-(p-tolyl)-2H-benzo[d][1,2,3]triazole(**2l**)+5-methyl-2-phenyl-2H-benzo[d][1,2,3]triazole(**2l'**):

The title mixture was prepared according to the general procedure as a yellow solid.  $^1\text{H}$  NMR (400 MHz,  $\text{CDCl}_3$ )  $\delta$  8.35-8.37(m, 2H), 8.26 (d,  $J$  = 8.0 Hz, 1H), 8.74-8.773 (m, 1H), 7.94 (d,  $J$  = 8.0 Hz, 1H), 7.69 (d,  $J$  = 8.0 Hz, 1H), 7.54-7.58 (m, 1H), 7.42-7.47 (m, 3H), 7.37 (d,  $J$  = 8.0 Hz, 1H), 7.26-7.28 (m, 1H), 2.53 (s, 3H), 2.45 (s, 3H);  $^{13}\text{C}$  NMR (100 MHz,  $\text{CDCl}_3$ )  $\delta$  145.6, 144.9, 143.8, 139.2, 137.3, 131.2, 130.2, 130.0, 129.7, 129.4, 129.0, 128.7, 127.0, 122.9, 122.7, 120.5, 120.5, 118.3, 117.8, 116.5, 22.2, 21.2; HRMS (ESI) calcd. for  $\text{C}_{13}\text{H}_{11}\text{N}_3$  [ $\text{M}^+$ ]: 209.0953, found: 209.0966.

2-(4-chlorophenyl)-2H-benzo[d][1,2,3]triazole(3n)+5-chloro-2-phenyl-2H-benzo[d][1,2,3]triazole(2m/m'):

The title compound was prepared according to the general procedure as a whitesolid. <sup>1</sup>H NMR (400 MHz, CDCl<sub>3</sub>) δ=7.29 (t, *J* = 4.0 Hz, 1H), 8.30 (t, *J* = 4.0 Hz, 3H), 8.28 (t, *J* = 8.0 Hz, 2H), 7.88-7.937.29 (m, 5H), 7.86 (d, *J* = 4.0 Hz, 0.5H), 7.84 (d, *J* = 4.0 Hz, 0.5H), 7.51-7.56(m, 1.5H), 7.46-7.53(m, 5H), 7.39-7.44(m, 4H), 7.36 (d, *J* = 4.0 Hz, 0.5H), 7.34 (d, *J* = 4.0 Hz, 0.5H). <sup>13</sup>C NMR (100 MHz) δ= 145.3, 145.1, 143.5, 134.8, 132.9, 129.6, 129.5, 129.3, 128.7, 127.4, 121.7, 120.6, 119.6, 118.4, 117.4; HRMS (ESI) calcd. for C<sub>12</sub>H<sub>8</sub>ClN<sub>3</sub> [M<sup>+</sup>]: 229.0407, found: 229.0452.

4-(2H-benzo[d][1,2,3]triazol-2-yl)benzotrile(2n)+2-phenyl-2H-benzo[d][1,2,3]triazole-5-carbonitrile(2n/n'):

The title compound was prepared according to the general procedure as a yellow solid. <sup>1</sup>H NMR (CDCl<sub>3</sub>, 400 MHz): δ= 8.49 (d, *J* = 8.0 Hz, 2H), 8.35-8.37(m, 0.5H), 8.03(d, *J* = 12.0 Hz, 0.25H), 8.88-7.93 (m, 2H), 8.82-7.85(m, 2H), 8.51-7.60(m, 1H), 7.43-7.47(m, 2H); <sup>13</sup>C NMR (100 MHz, CDCl<sub>3</sub>) δ = 145.5, 133.6, 130.1, 129.7, 128.2, 128.0, 125.6, 121.0, 120.2, 118.6, 118.1, 112.4; HRMS (ESI) calcd. for C<sub>13</sub>H<sub>8</sub>N<sub>4</sub> [M<sup>+</sup>]: 220.0749, found: 220.0761.

2-(3,5-Dimethylphenyl)-2H-benzo[d][1,2,3]triazole (2o):

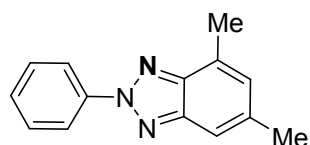

The title compound was prepared according to the general procedure as a white solid. <sup>1</sup>H NMR (400 MHz, CDCl<sub>3</sub>) δ= 8.33-8.35 (m, 2H), 7.52-7.56 (m, 2H), 7.48 (s, 1H), 7.41-7.44 (m, 1H), 2.45 (d, *J* = 0.5 Hz, 6H); <sup>13</sup>C NMR (100 MHz, CDCl<sub>3</sub>) δ= 145.6, 144.4, 129.3, 129.1, 128.49, 128.40,



120.5, 113.8, 22.2, 17.1; HRMS (ESI) calcd. for C<sub>14</sub>H<sub>13</sub>N<sub>3</sub> [M<sup>+</sup>]: 223.1109, found: 223.1128.

5-Methyl-2-m-tolyl-2H-benzo[d][1,2,3]triazole (2p)+ 4-methyl-2- (m-tolyl)-2H-benzo[d][1,2,3]triazole(2p/p<sup>+</sup>):

The title compound was prepared according to the general procedure as a white solid. <sup>1</sup>H NMR (400 MHz, CDCl<sub>3</sub>) δ= 8.15 (s, 1H), 8.11 (d, *J* = 8.0Hz,1H), 7.90 (d, *J* = 8.0 Hz, 1H), 7.71-7.72 (m, 0.4H), 7.65 (d, *J* = 4.0 Hz, 1H),7.41(t, *J* = 8.0 Hz, 1H), 7.34-7.37 (m, 0.4H), 7.22-7.25 (m, 2H), 7.13 (s, 0.4H), 2.50 (s, 3H), 2.47 (s, 3H), 2.45 (s, 0.6H), 2.41 (s, 0.6H); <sup>13</sup>C NMR (100 MHz, CDCl<sub>3</sub>) δ = 152.8, 145.5, 143.7, 141.7, 140.4, 139.5, 139.5, 139.0, 137.3, 131.7, 130.4, 130.3, 130.1, 129.9, 129.2, 129.2, 128.9, 122.9, 121.9, 121.0, 120.5, 118.5, 117.8, 117.7, 116.5,7 22.18, 21.4; HRMS (ESI) calcd. for C<sub>14</sub>H<sub>13</sub>N<sub>3</sub> [M<sup>+</sup>]: 223.1109, found: 223.1121.

5-isopropyl-2-(3-isopropylphenyl)-2H-benzo[d][1,2,3]triazole(2q):

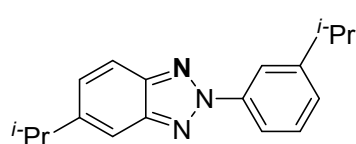

The title compound was prepared according to the general procedure as a white solid. <sup>1</sup>H NMR (400 MHz, CDCl<sub>3</sub>) δ= 8.22 (s, 1H), 8.15 (d, *J* = 8.0 Hz,1H), 7.96 (d, *J* = 8.0 Hz, 1H), 7.73 (s, 1H), 7.45 (t, *J* = 8.0 Hz, 1H), 7.35(t, *J* = 8.0 Hz,1H), 3.04-3.10 (m, 2H),1.37 (s, 3H), 1.35 (s, 1H); <sup>13</sup>C NMR (100 MHz, CDCl<sub>3</sub>) δ = 150.6, 148.2, 145.5, 143.9, 129.3, 128.1, 127.0, 118.6, 118.1, 117.9, 113.7, 113.7, 113.7, 34.5, 34.3, 23.9, 23.7, HRMS (ESI) calcd. for C<sub>18</sub>H<sub>21</sub>N<sub>3</sub> [M<sup>+</sup>]: 279.1735, found: 279.1762.

2-Phenyl-2Hbenzo[d][1,2,3]triazole (2a<sup>+</sup>):

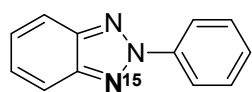

The title compound was prepared according to the general procedure as a yellow solid. <sup>1</sup>H NMR (400 MHz,

CDCl<sub>3</sub>)  $\delta$ = 8.38-8.35 (m, 2H), 7.96-7.92 (m, 2H), 7.55 (t,  $J$  = 8.0 Hz, 2H), 7.48-7.41(m, 3H); HRMS for C<sub>12</sub>H<sub>9</sub>N<sub>2</sub>N<sup>15</sup> [M<sup>+</sup>]: 196.1579

---

## References

- 1  
Zhang, C.; Jiao, N. *Angew. Chem. Int. Ed.* 2010, **49**, 6174. 2  
Ellman, J. A.; Lavis, L. D.; Bergman, R. G.; Lian, Y. *J. Am. Chem. Soc.* 2013, **135**, 7122.  
3 Dong, J. W; Jin, B.; Sun, P. P. *Org. Lett.*, 2014, **16**, 4540.

## 8 <sup>1</sup>H and <sup>13</sup>C NMR spectra for all compounds

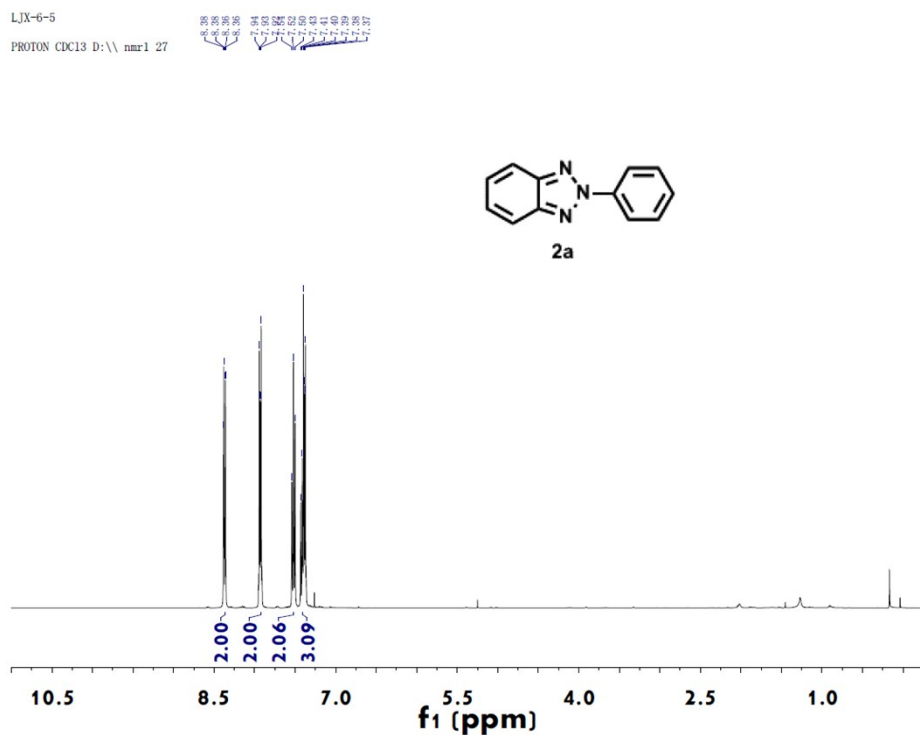

LJX-6-5  
C13CPD CDC13 D:\ nmr1 27

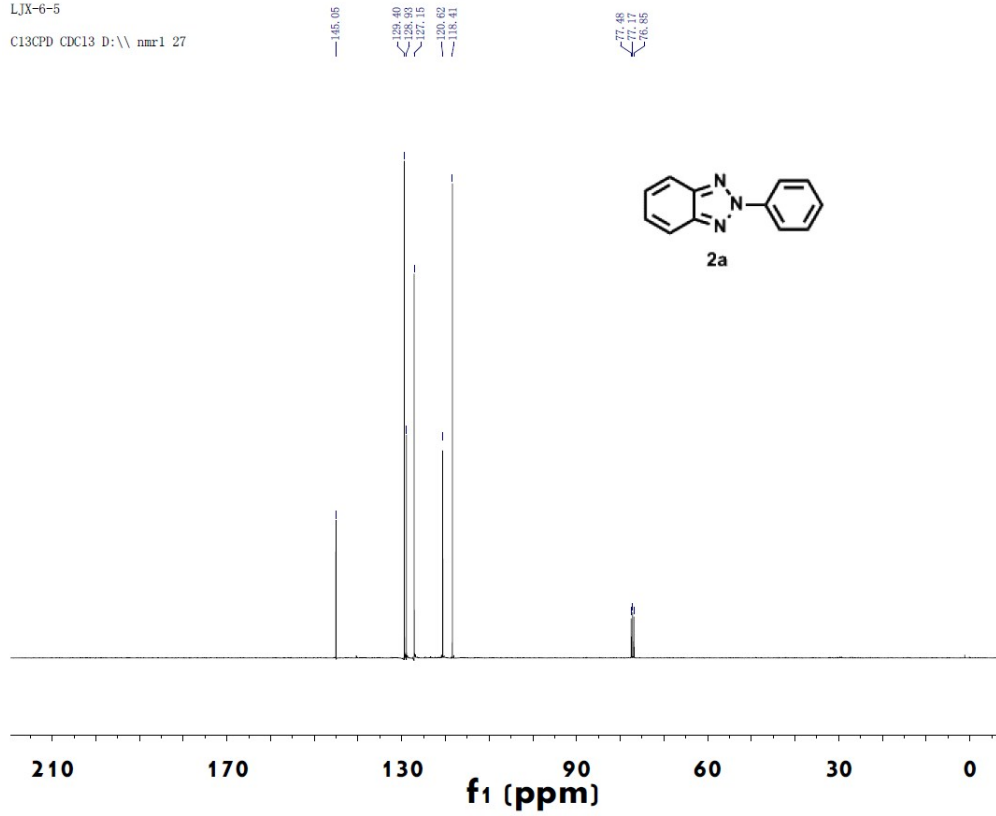

20151207-LJX-5-67-1-CDC13-H1  
Std proton

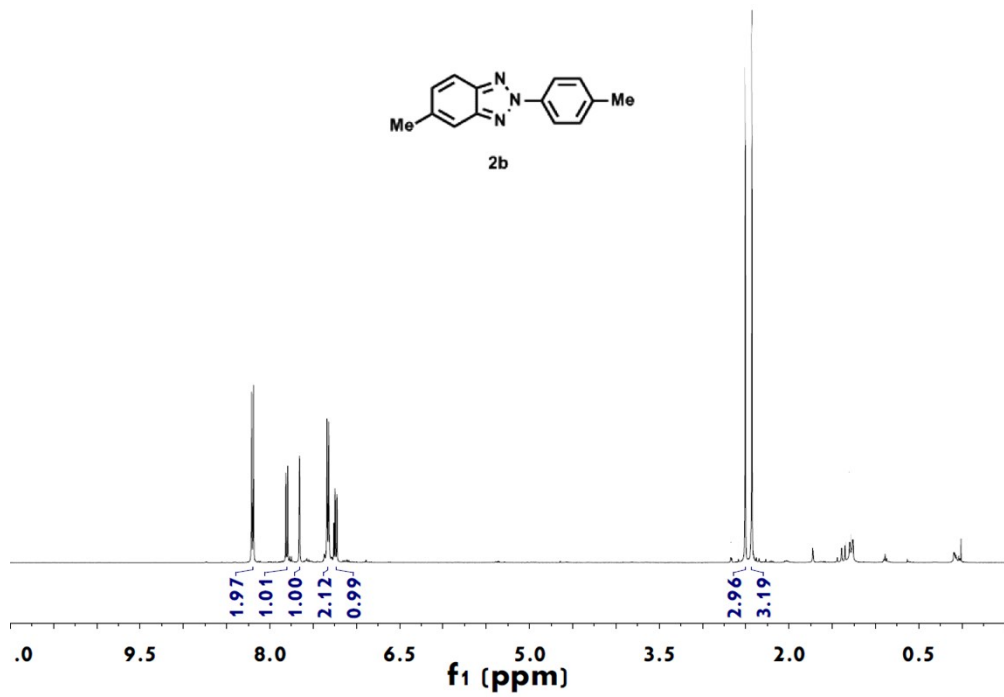

LJX-6-69-1

C13CPD CDCl3 D:\ nmr1 32

145.48  
145.14  
143.84  
143.49

128.07  
128.76

120.43  
119.56  
115.12

77.38  
77.05  
76.73

29.37  
28.53

15.42  
15.28

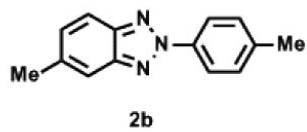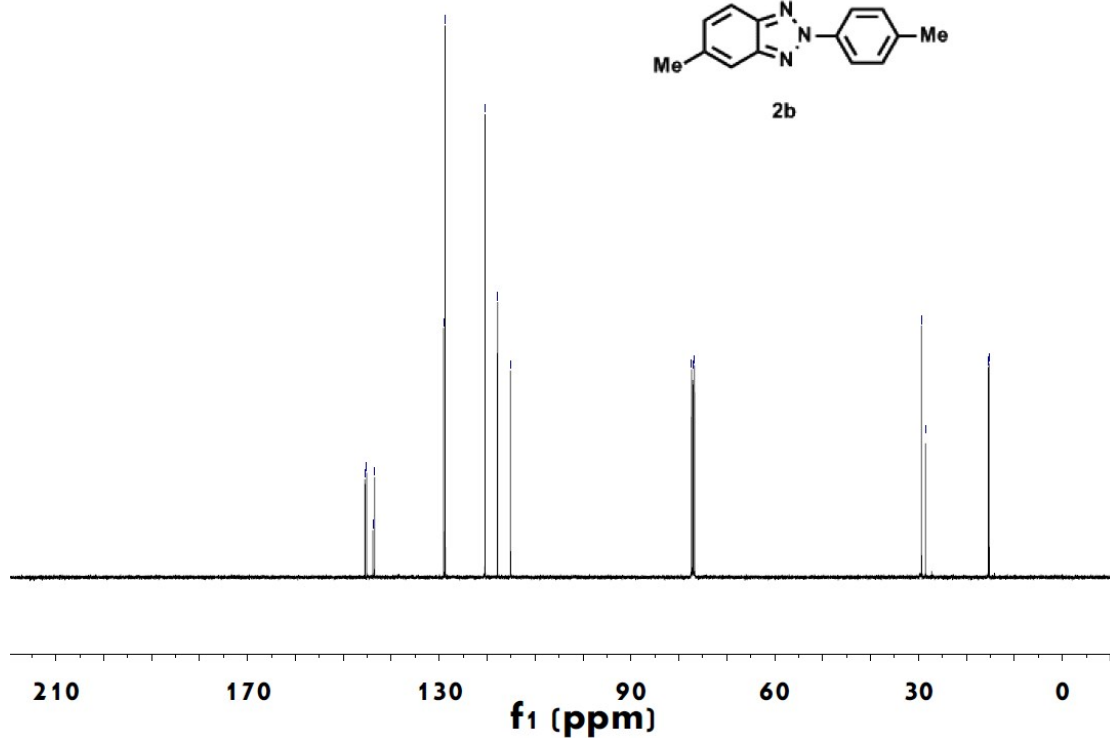

LJX-6-69-1

PROTON CDCl3 D:\ nmr1 32

8.23  
8.22  
7.52  
7.51  
7.50  
7.49  
7.48  
7.47  
7.46  
7.45  
7.44  
7.43

3.85  
3.84  
3.83  
3.82  
3.81  
3.80  
3.79  
3.78  
3.77  
3.76  
3.75

1.35  
1.34  
1.33  
1.32

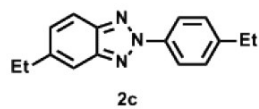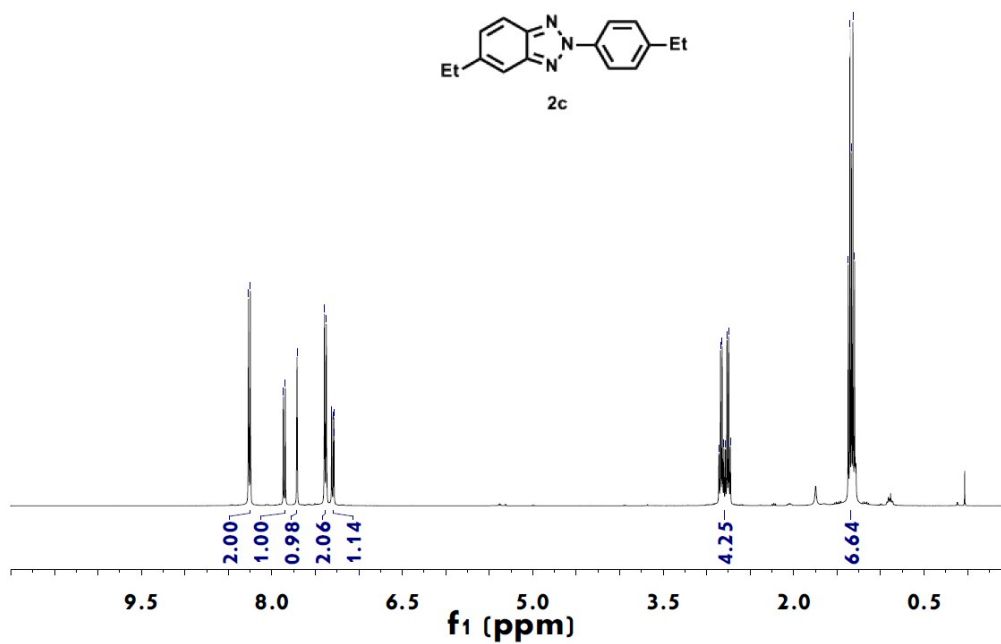

LJX-5-69-1  
C13CPD CDC13 D:\ nmr1 35

145.48  
145.13  
143.48

129.07  
128.76

120.43  
117.84  
115.12

77.38  
77.06  
76.74

29.37  
28.53

15.42  
15.26

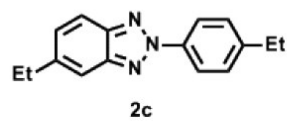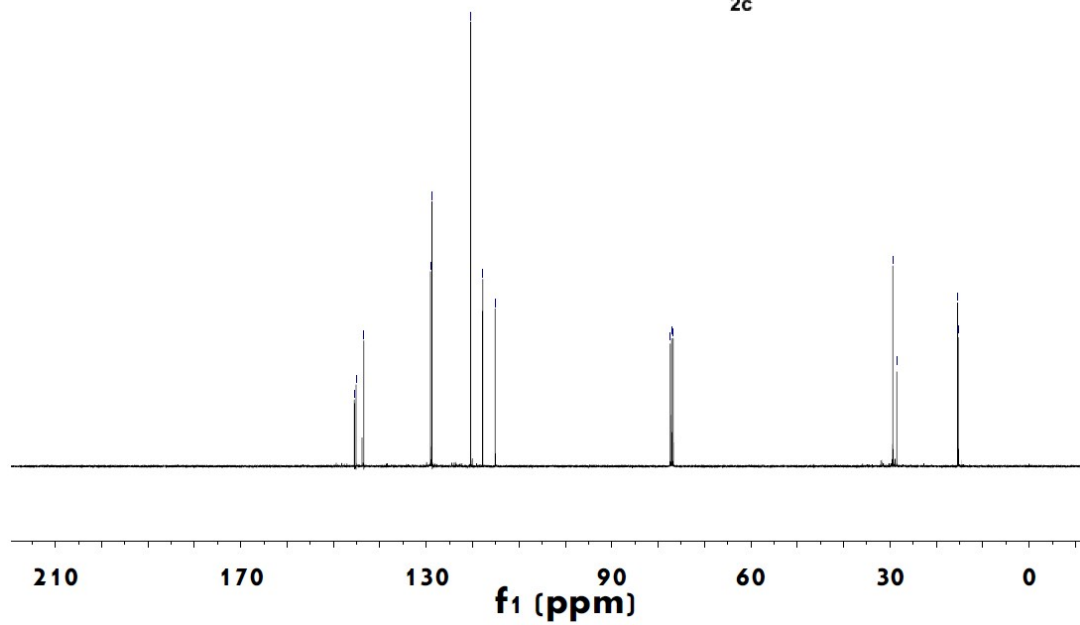

LJX-6-34-1  
PROTON CDC13 D:\ nmr1 25

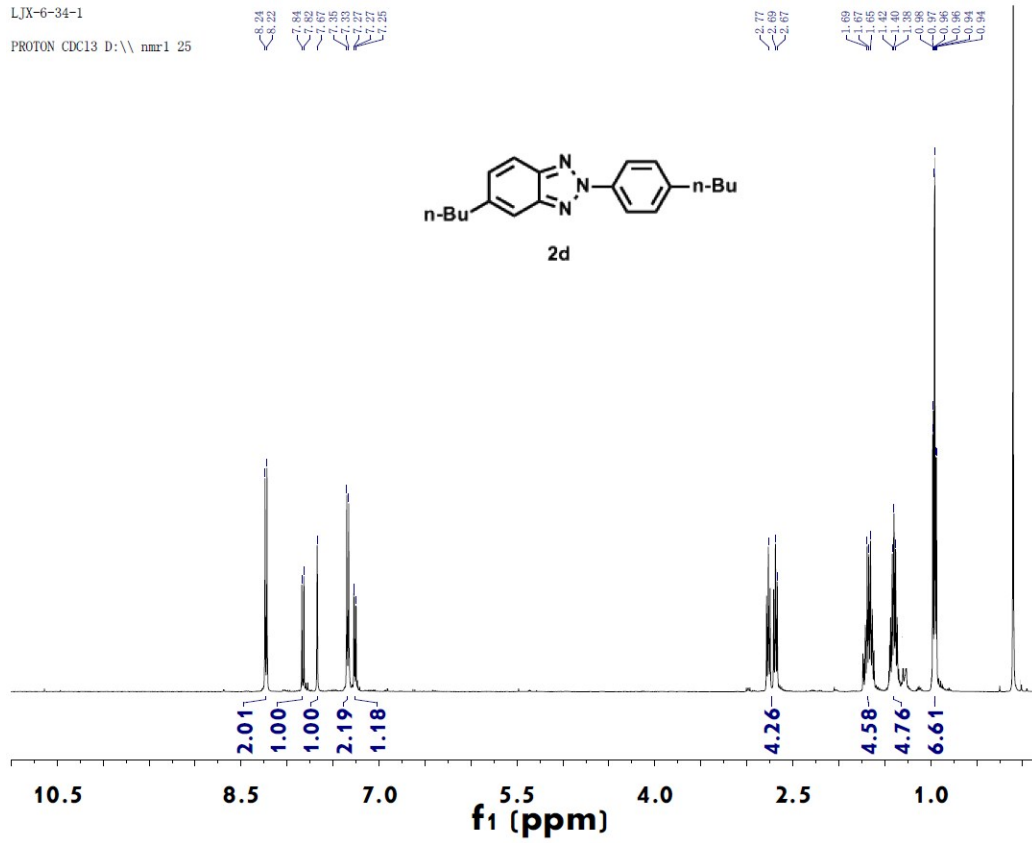

LJX-6-34-1  
C13CPD CDC13 D:\ nmr1 25

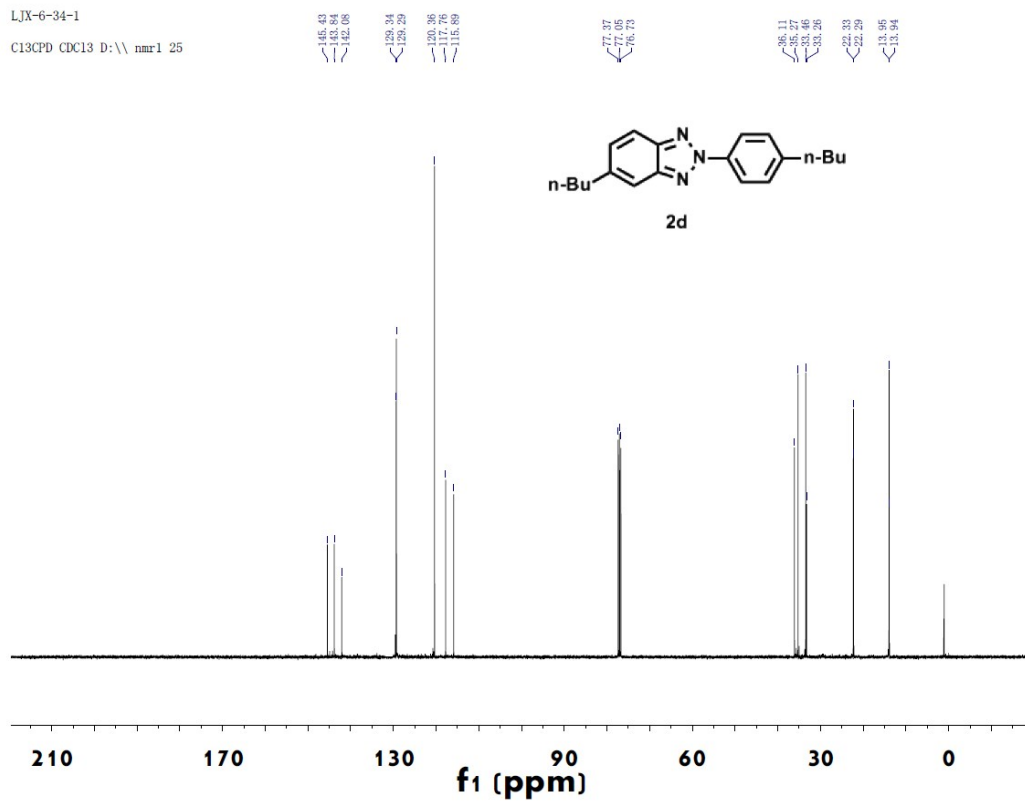

LJX-6-69-2  
PROTON CDC13 D:\ nmr1 33

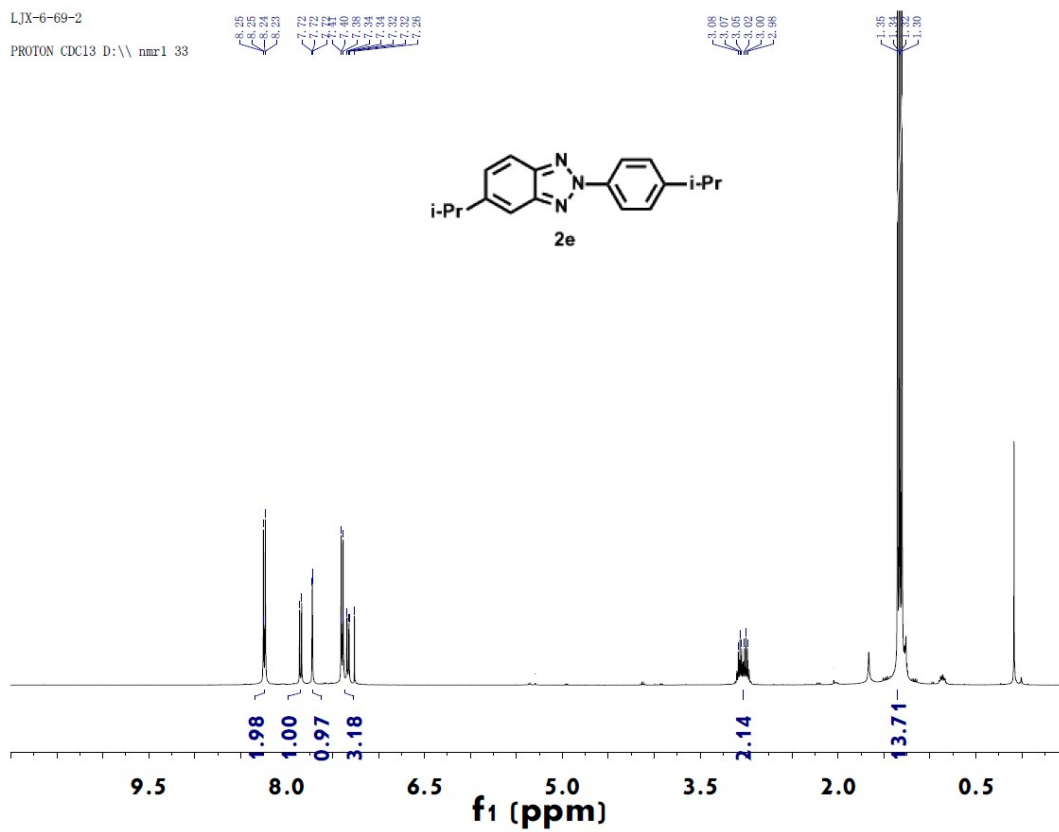

LJX-6-69-2  
C13CPD CDC13 D:\ nmr1 33

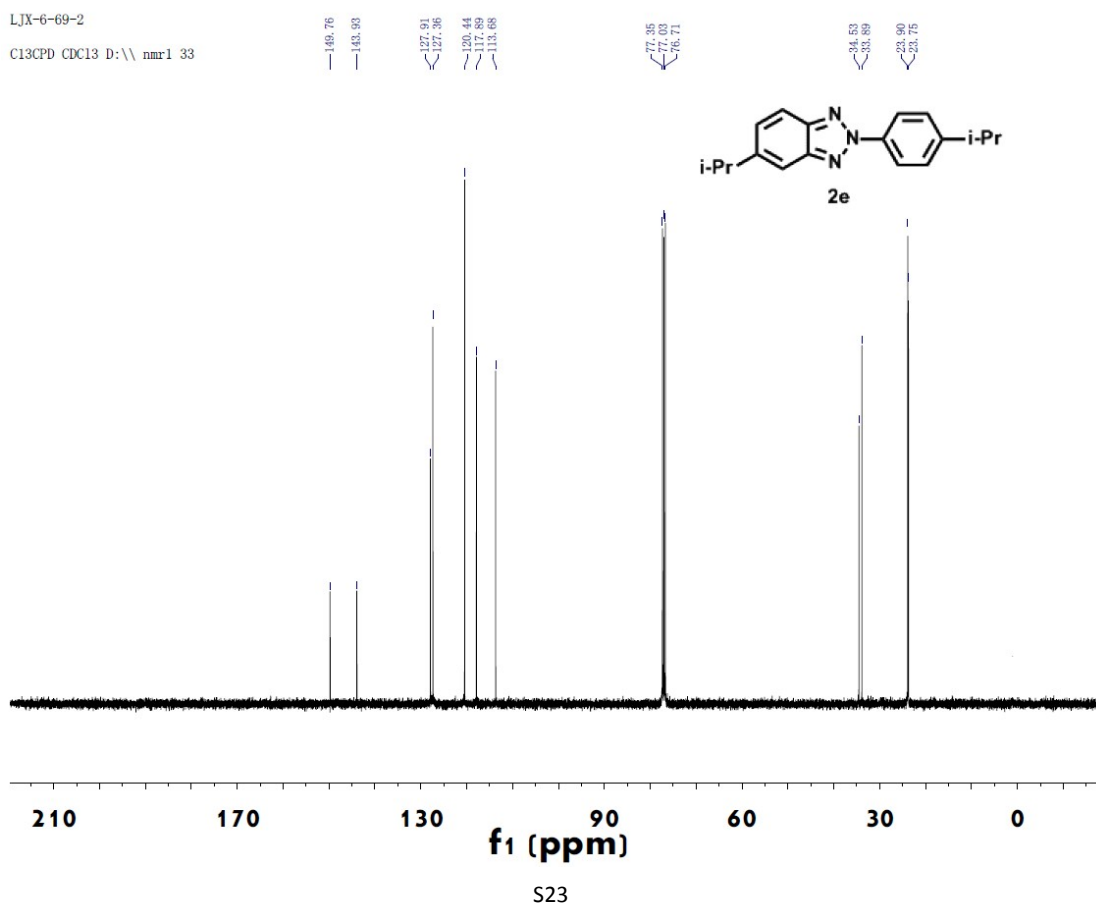

LJX-6-34-2

PROTON CDC13 D:\ nmr1 26

8.54, 8.53, 8.52, 8.51, 8.50, 8.49, 8.48, 8.47, 8.46, 8.45, 8.44, 8.43, 8.42, 8.41, 8.40, 8.39, 8.38, 8.37, 8.36, 8.35, 8.34, 8.33, 8.32, 8.31, 8.30, 8.29, 8.28, 8.27, 8.26, 8.25, 8.24, 8.23, 8.22, 8.21, 8.20, 8.19, 8.18, 8.17, 8.16, 8.15, 8.14, 8.13, 8.12, 8.11, 8.10, 8.09, 8.08, 8.07, 8.06, 8.05, 8.04, 8.03, 8.02, 8.01, 8.00, 7.99, 7.98, 7.97, 7.96, 7.95, 7.94, 7.93, 7.92, 7.91, 7.90, 7.89, 7.88, 7.87, 7.86, 7.85, 7.84, 7.83, 7.82, 7.81, 7.80, 7.79, 7.78, 7.77, 7.76, 7.75, 7.74, 7.73, 7.72, 7.71, 7.70, 7.69, 7.68, 7.67, 7.66, 7.65, 7.64, 7.63, 7.62, 7.61, 7.60, 7.59, 7.58, 7.57, 7.56, 7.55, 7.54, 7.53, 7.52, 7.51, 7.50, 7.49, 7.48, 7.47, 7.46, 7.45, 7.44, 7.43, 7.42, 7.41, 7.40, 7.39, 7.38, 7.37, 7.36, 7.35, 7.34, 7.33, 7.32, 7.31, 7.30, 7.29, 7.28, 7.27, 7.26, 7.25, 7.24, 7.23, 7.22, 7.21, 7.20, 7.19, 7.18, 7.17, 7.16, 7.15, 7.14, 7.13, 7.12, 7.11, 7.10, 7.09, 7.08, 7.07, 7.06, 7.05, 7.04, 7.03, 7.02, 7.01, 7.00, 6.99, 6.98, 6.97, 6.96, 6.95, 6.94, 6.93, 6.92, 6.91, 6.90, 6.89, 6.88, 6.87, 6.86, 6.85, 6.84, 6.83, 6.82, 6.81, 6.80, 6.79, 6.78, 6.77, 6.76, 6.75, 6.74, 6.73, 6.72, 6.71, 6.70, 6.69, 6.68, 6.67, 6.66, 6.65, 6.64, 6.63, 6.62, 6.61, 6.60, 6.59, 6.58, 6.57, 6.56, 6.55, 6.54, 6.53, 6.52, 6.51, 6.50, 6.49, 6.48, 6.47, 6.46, 6.45, 6.44, 6.43, 6.42, 6.41, 6.40, 6.39, 6.38, 6.37, 6.36, 6.35, 6.34, 6.33, 6.32, 6.31, 6.30, 6.29, 6.28, 6.27, 6.26, 6.25, 6.24, 6.23, 6.22, 6.21, 6.20, 6.19, 6.18, 6.17, 6.16, 6.15, 6.14, 6.13, 6.12, 6.11, 6.10, 6.09, 6.08, 6.07, 6.06, 6.05, 6.04, 6.03, 6.02, 6.01, 6.00, 5.99, 5.98, 5.97, 5.96, 5.95, 5.94, 5.93, 5.92, 5.91, 5.90, 5.89, 5.88, 5.87, 5.86, 5.85, 5.84, 5.83, 5.82, 5.81, 5.80, 5.79, 5.78, 5.77, 5.76, 5.75, 5.74, 5.73, 5.72, 5.71, 5.70, 5.69, 5.68, 5.67, 5.66, 5.65, 5.64, 5.63, 5.62, 5.61, 5.60, 5.59, 5.58, 5.57, 5.56, 5.55, 5.54, 5.53, 5.52, 5.51, 5.50, 5.49, 5.48, 5.47, 5.46, 5.45, 5.44, 5.43, 5.42, 5.41, 5.40, 5.39, 5.38, 5.37, 5.36, 5.35, 5.34, 5.33, 5.32, 5.31, 5.30, 5.29, 5.28, 5.27, 5.26, 5.25, 5.24, 5.23, 5.22, 5.21, 5.20, 5.19, 5.18, 5.17, 5.16, 5.15, 5.14, 5.13, 5.12, 5.11, 5.10, 5.09, 5.08, 5.07, 5.06, 5.05, 5.04, 5.03, 5.02, 5.01, 5.00, 4.99, 4.98, 4.97, 4.96, 4.95, 4.94, 4.93, 4.92, 4.91, 4.90, 4.89, 4.88, 4.87, 4.86, 4.85, 4.84, 4.83, 4.82, 4.81, 4.80, 4.79, 4.78, 4.77, 4.76, 4.75, 4.74, 4.73, 4.72, 4.71, 4.70, 4.69, 4.68, 4.67, 4.66, 4.65, 4.64, 4.63, 4.62, 4.61, 4.60, 4.59, 4.58, 4.57, 4.56, 4.55, 4.54, 4.53, 4.52, 4.51, 4.50, 4.49, 4.48, 4.47, 4.46, 4.45, 4.44, 4.43, 4.42, 4.41, 4.40, 4.39, 4.38, 4.37, 4.36, 4.35, 4.34, 4.33, 4.32, 4.31, 4.30, 4.29, 4.28, 4.27, 4.26, 4.25, 4.24, 4.23, 4.22, 4.21, 4.20, 4.19, 4.18, 4.17, 4.16, 4.15, 4.14, 4.13, 4.12, 4.11, 4.10, 4.09, 4.08, 4.07, 4.06, 4.05, 4.04, 4.03, 4.02, 4.01, 4.00, 3.99, 3.98, 3.97, 3.96, 3.95, 3.94, 3.93, 3.92, 3.91, 3.90, 3.89, 3.88, 3.87, 3.86, 3.85, 3.84, 3.83, 3.82, 3.81, 3.80, 3.79, 3.78, 3.77, 3.76, 3.75, 3.74, 3.73, 3.72, 3.71, 3.70, 3.69, 3.68, 3.67, 3.66, 3.65, 3.64, 3.63, 3.62, 3.61, 3.60, 3.59, 3.58, 3.57, 3.56, 3.55, 3.54, 3.53, 3.52, 3.51, 3.50, 3.49, 3.48, 3.47, 3.46, 3.45, 3.44, 3.43, 3.42, 3.41, 3.40, 3.39, 3.38, 3.37, 3.36, 3.35, 3.34, 3.33, 3.32, 3.31, 3.30, 3.29, 3.28, 3.27, 3.26, 3.25, 3.24, 3.23, 3.22, 3.21, 3.20, 3.19, 3.18, 3.17, 3.16, 3.15, 3.14, 3.13, 3.12, 3.11, 3.10, 3.09, 3.08, 3.07, 3.06, 3.05, 3.04, 3.03, 3.02, 3.01, 3.00, 2.99, 2.98, 2.97, 2.96, 2.95, 2.94, 2.93, 2.92, 2.91, 2.90, 2.89, 2.88, 2.87, 2.86, 2.85, 2.84, 2.83, 2.82, 2.81, 2.80, 2.79, 2.78, 2.77, 2.76, 2.75, 2.74, 2.73, 2.72, 2.71, 2.70, 2.69, 2.68, 2.67, 2.66, 2.65, 2.64, 2.63, 2.62, 2.61, 2.60, 2.59, 2.58, 2.57, 2.56, 2.55, 2.54, 2.53, 2.52, 2.51, 2.50, 2.49, 2.48, 2.47, 2.46, 2.45, 2.44, 2.43, 2.42, 2.41, 2.40, 2.39, 2.38, 2.37, 2.36, 2.35, 2.34, 2.33, 2.32, 2.31, 2.30, 2.29, 2.28, 2.27, 2.26, 2.25, 2.24, 2.23, 2.22, 2.21, 2.20, 2.19, 2.18, 2.17, 2.16, 2.15, 2.14, 2.13, 2.12, 2.11, 2.10, 2.09, 2.08, 2.07, 2.06, 2.05, 2.04, 2.03, 2.02, 2.01, 2.00, 1.99, 1.98, 1.97, 1.96, 1.95, 1.94, 1.93, 1.92, 1.91, 1.90, 1.89, 1.88, 1.87, 1.86, 1.85, 1.84, 1.83, 1.82, 1.81, 1.80, 1.79, 1.78, 1.77, 1.76, 1.75, 1.74, 1.73, 1.72, 1.71, 1.70, 1.69, 1.68, 1.67, 1.66, 1.65, 1.64, 1.63, 1.62, 1.61, 1.60, 1.59, 1.58, 1.57, 1.56, 1.55, 1.54, 1.53, 1.52, 1.51, 1.50, 1.49, 1.48, 1.47, 1.46, 1.45, 1.44, 1.43, 1.42, 1.41, 1.40, 1.39, 1.38, 1.37, 1.36, 1.35, 1.34, 1.33, 1.32, 1.31, 1.30, 1.29, 1.28, 1.27, 1.26, 1.25, 1.24, 1.23, 1.22, 1.21, 1.20, 1.19, 1.18, 1.17, 1.16, 1.15, 1.14, 1.13, 1.12, 1.11, 1.10, 1.09, 1.08, 1.07, 1.06, 1.05, 1.04, 1.03, 1.02, 1.01, 1.00, 0.99, 0.98, 0.97, 0.96, 0.95, 0.94, 0.93, 0.92, 0.91, 0.90, 0.89, 0.88, 0.87, 0.86, 0.85, 0.84, 0.83, 0.82, 0.81, 0.80, 0.79, 0.78, 0.77, 0.76, 0.75, 0.74, 0.73, 0.72, 0.71, 0.70, 0.69, 0.68, 0.67, 0.66, 0.65, 0.64, 0.63, 0.62, 0.61, 0.60, 0.59, 0.58, 0.57, 0.56, 0.55, 0.54, 0.53, 0.52, 0.51, 0.50, 0.49, 0.48, 0.47, 0.46, 0.45, 0.44, 0.43, 0.42, 0.41, 0.40, 0.39, 0.38, 0.37, 0.36, 0.35, 0.34, 0.33, 0.32, 0.31, 0.30, 0.29, 0.28, 0.27, 0.26, 0.25, 0.24, 0.23, 0.22, 0.21, 0.20, 0.19, 0.18, 0.17, 0.16, 0.15, 0.14, 0.13, 0.12, 0.11, 0.10, 0.09, 0.08, 0.07, 0.06, 0.05, 0.04, 0.03, 0.02, 0.01, 0.00

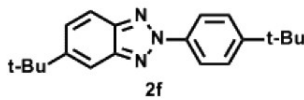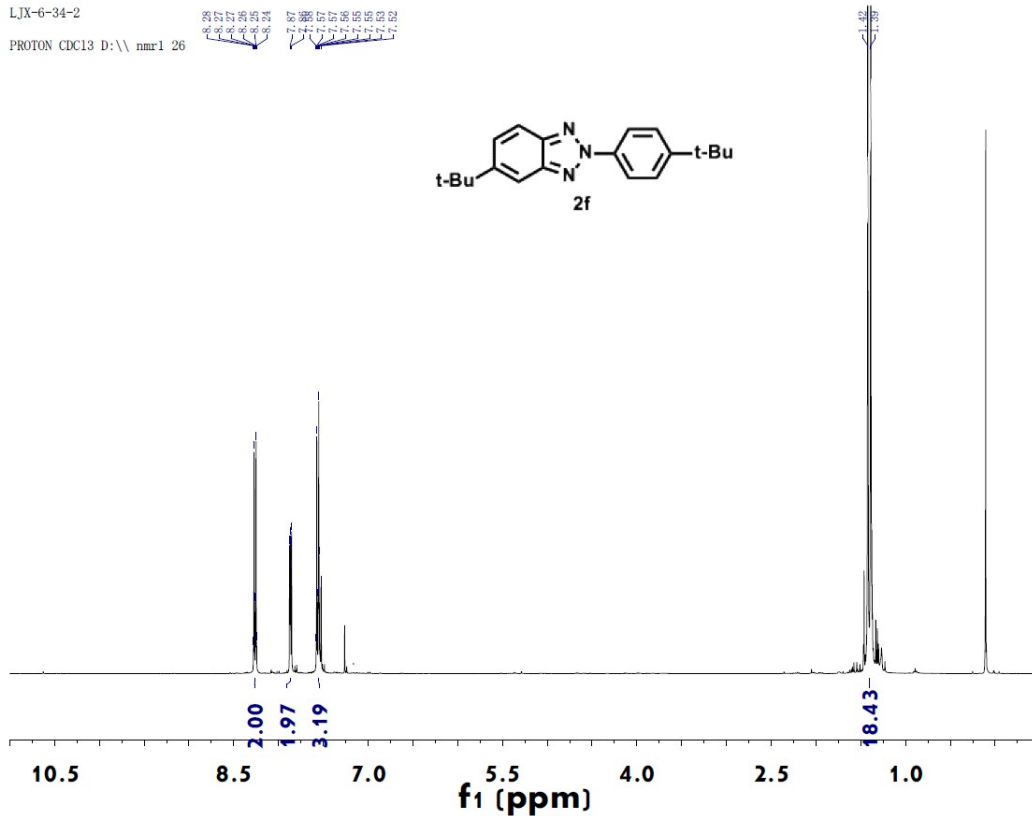

LJX-6-34-2

C13CPD CDC13 D:\ nmr1 26

152.02, 145.36, 126.79, 126.29, 120.09, 117.58, 112.76, 77.07, 77.05, 76.73, 31.32, 31.11

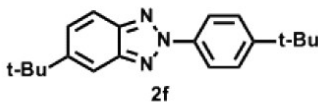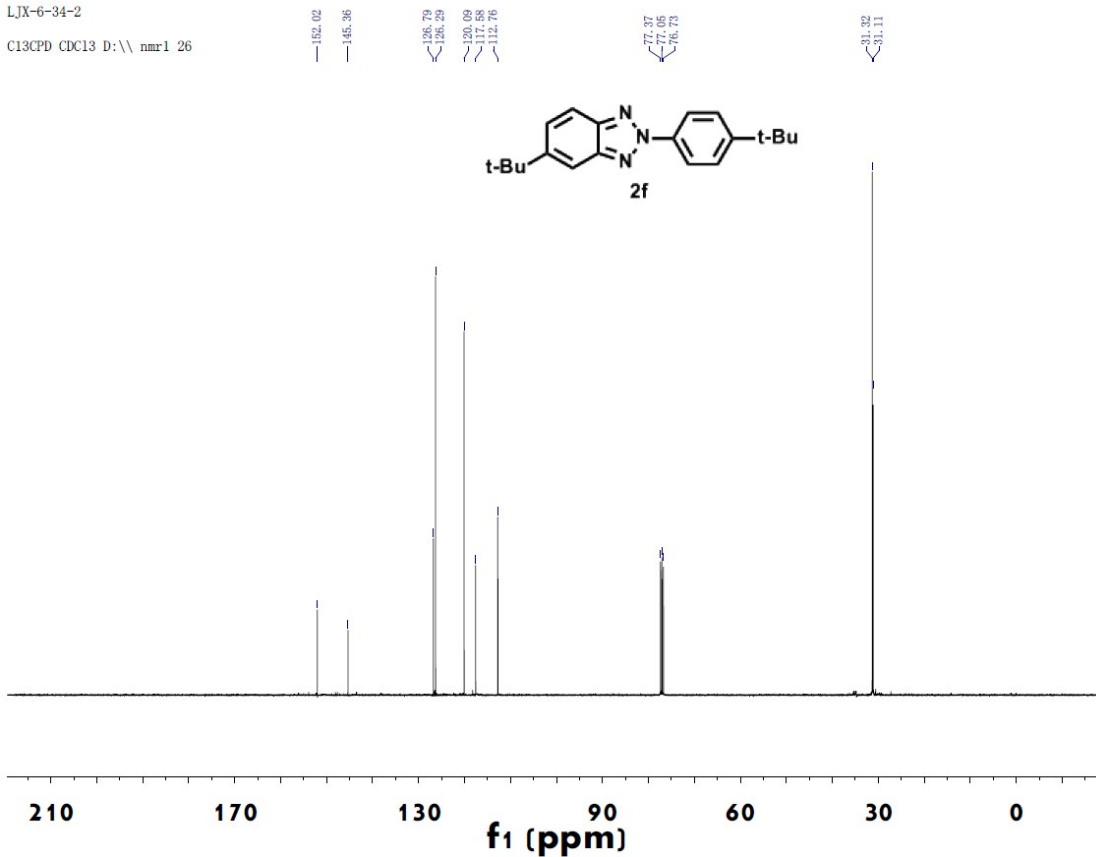



LJX-6-67-2  
PROTON CDC13 D:\ nmr1 31

8.29  
8.29  
8.29  
8.28  
8.28  
8.28  
7.91  
7.84  
7.84  
7.53  
7.53  
7.52  
7.52  
7.50  
7.50  
7.39  
7.39  
7.38  
7.38  
7.36  
7.36

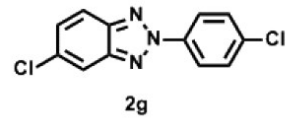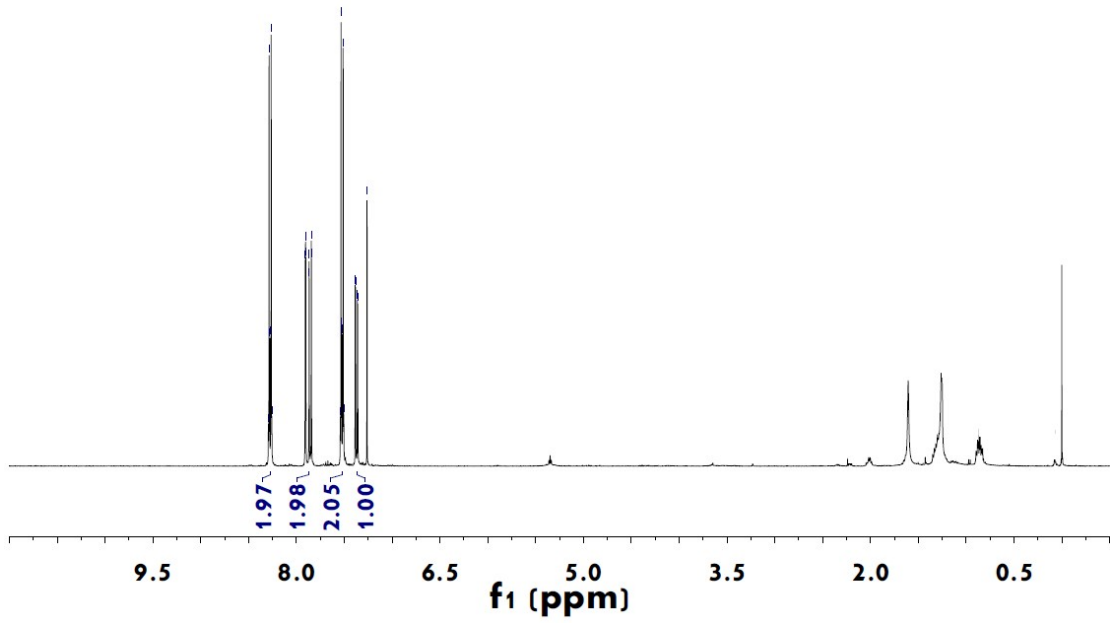

LJX-6-67-2  
C13CPD CDC13 D:\ nmr1 31

145.38  
143.58  
135.18  
132.67  
128.66  
128.05  
101.75  
115.67  
117.36

77.34  
77.02  
76.71

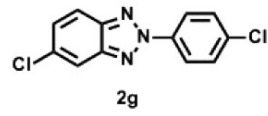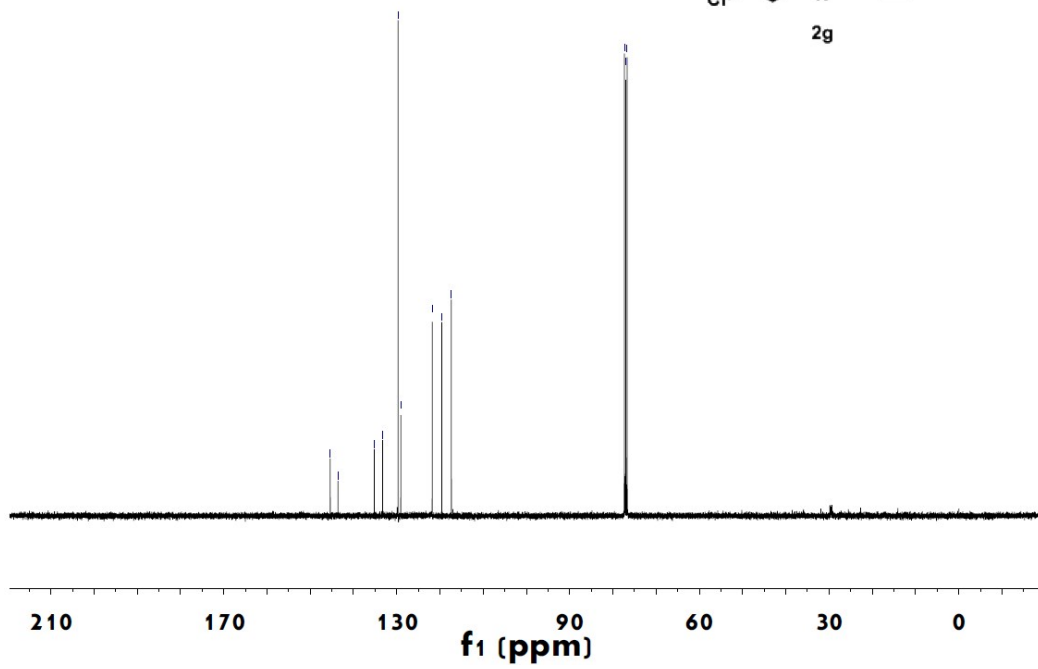

LJX-5-78-2  
 PROTON CDC13 D:\ nmr1 26

8.10  
 8.01  
 7.99  
 7.67  
 7.67  
 7.61  
 7.49  
 7.26

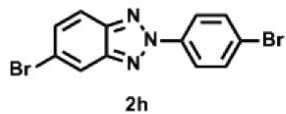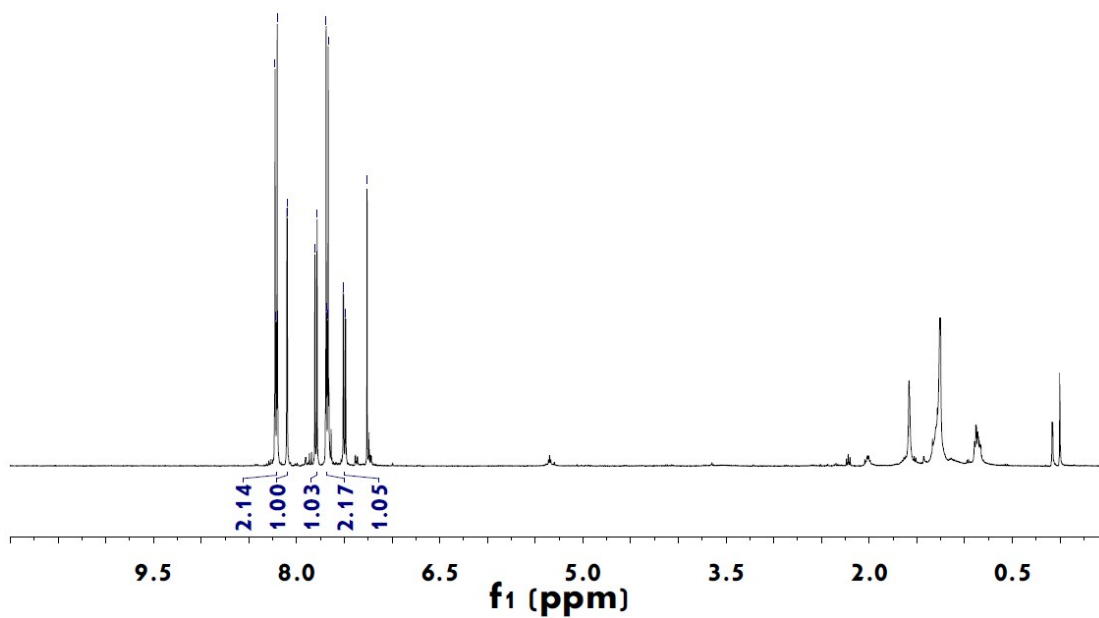

LJX-5-78-2  
 C13CPD CDC13 D:\ nmr1 26

145.95  
 143.74  
 133.67  
 131.37  
 123.25  
 122.06  
 121.31  
 120.79  
 119.75

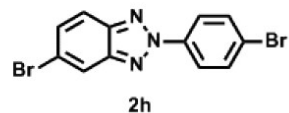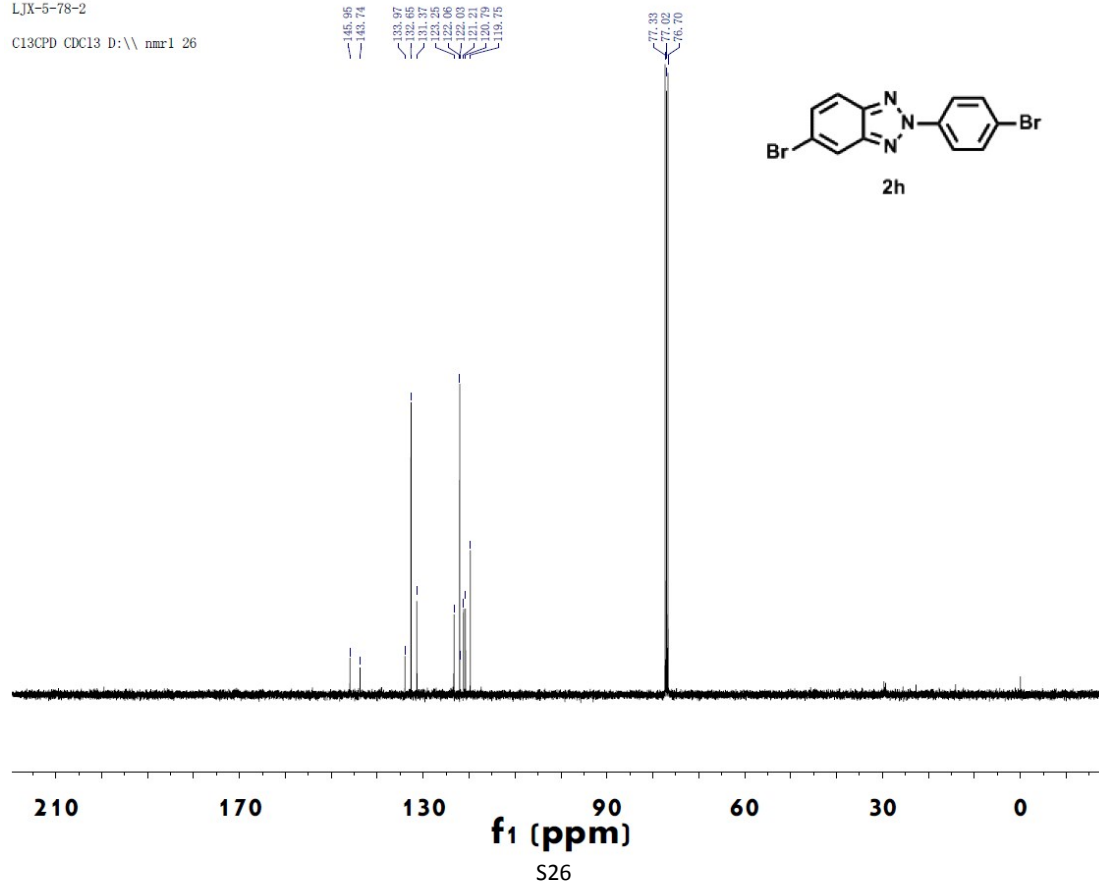

LJX-5-82-2

PROTON CDC13 D:\ nmr1 40

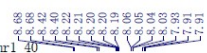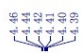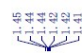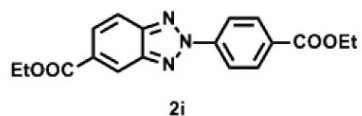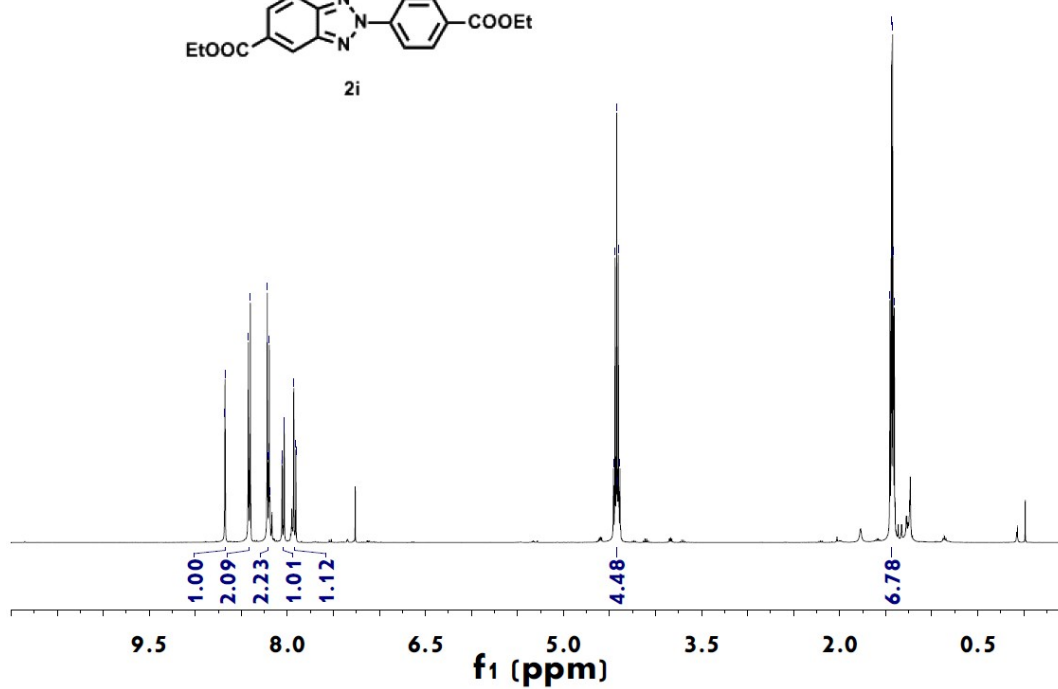

LJX-5-82-2

C13CPD CDC13 D:\ nmr1 40

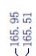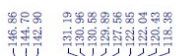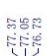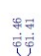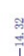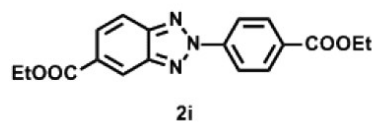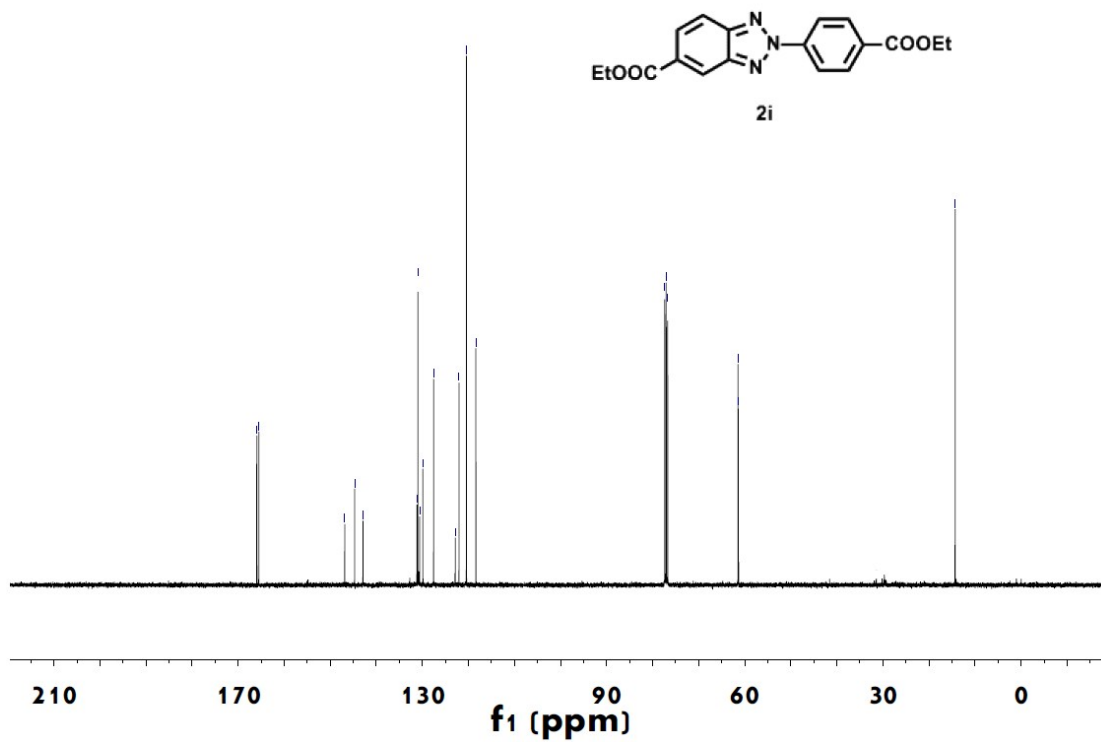

LJX-5-80-3  
PROTON CDC13 D:\nmr1 36

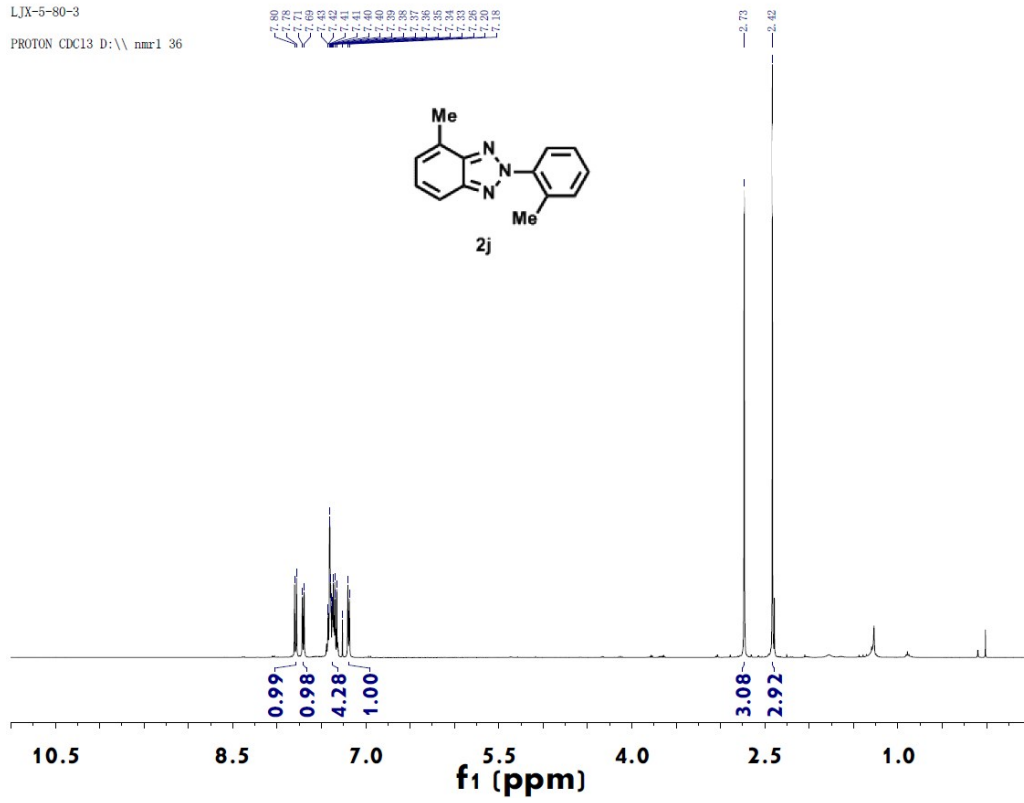

LJX-5-80-3  
C13CPD CDC13 D:\nmr1 36

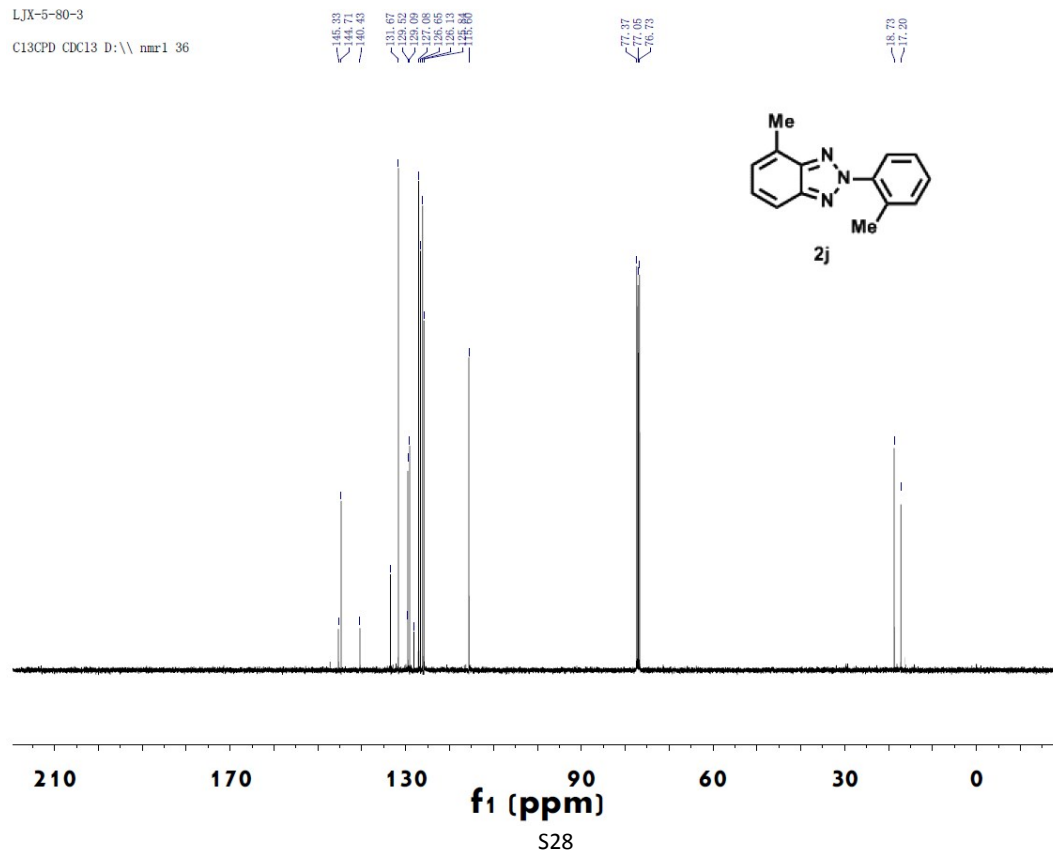

LJX-6-34-3  
PROTON CDC13 D:\ nmr1 27

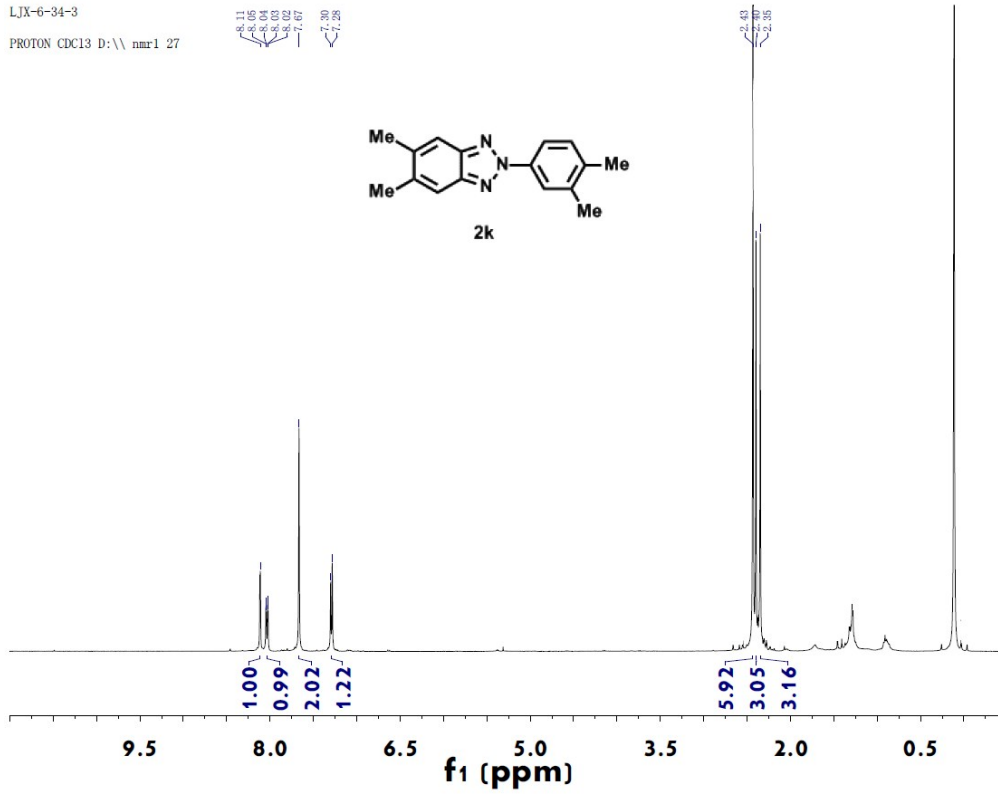

LJX-6-34-3  
C13CPD CDC13 D:\ nmr1 27

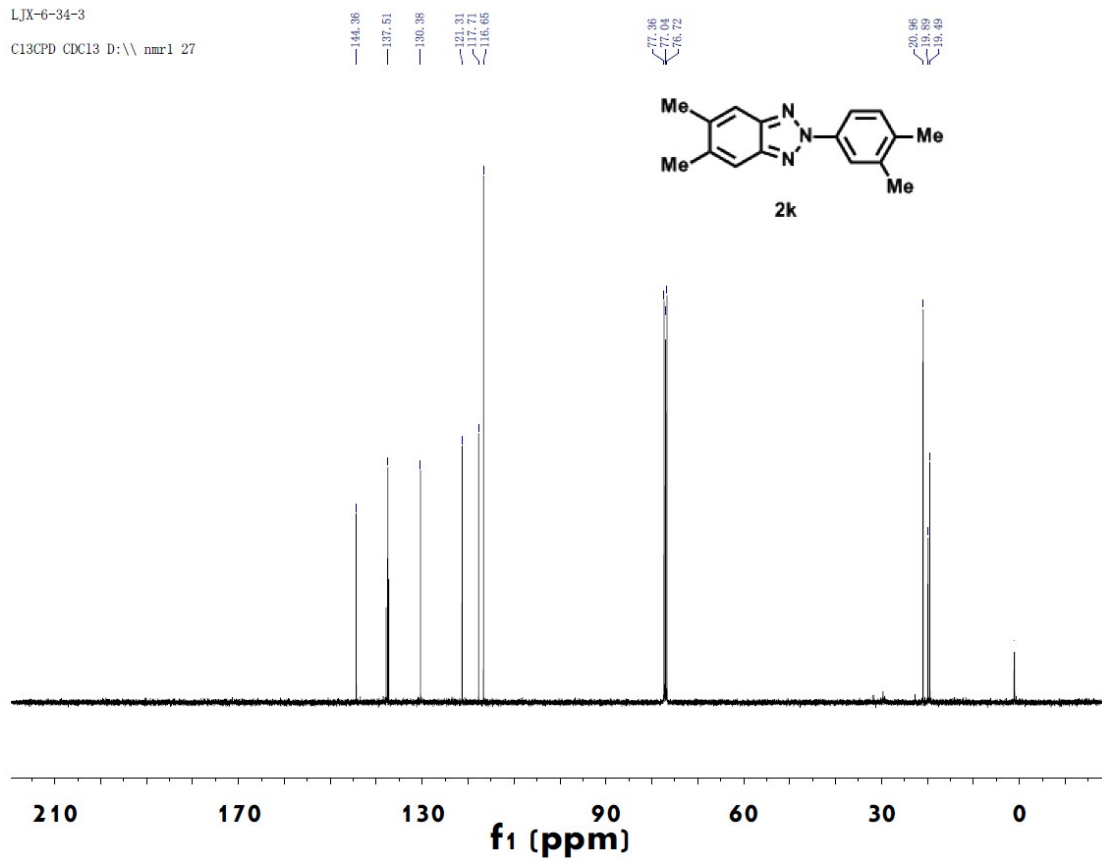

LJX-6-28

PROTON CDC13 D:\nmr1 39

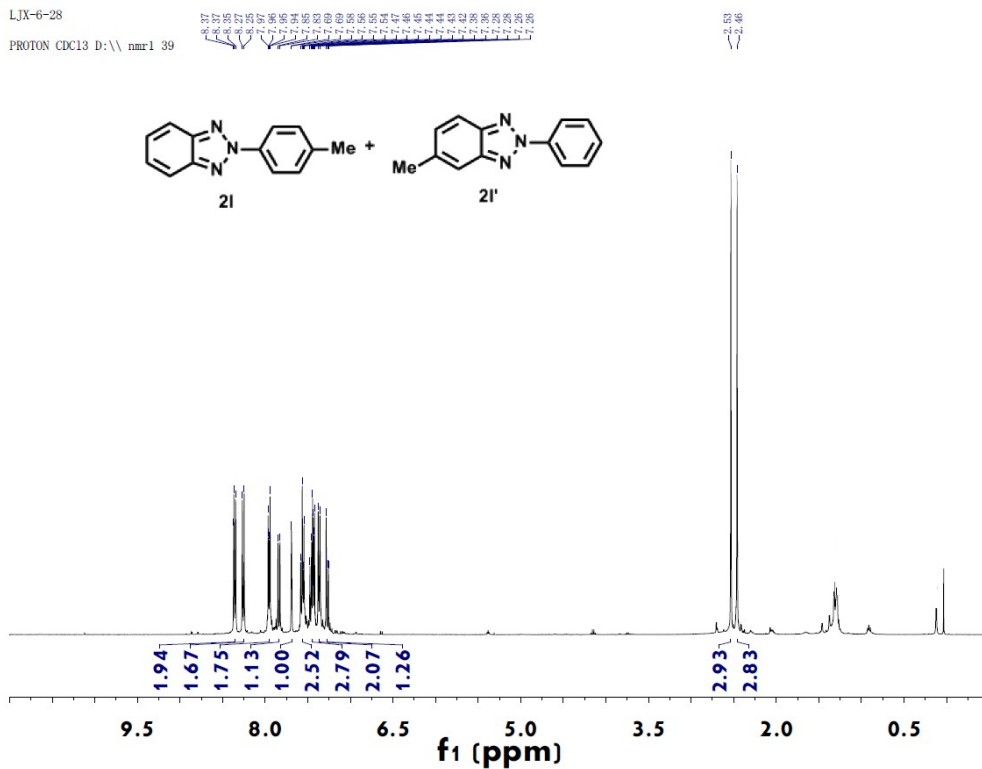

LJX-6-28

C13CPD CDC13 D:\nmr1 39

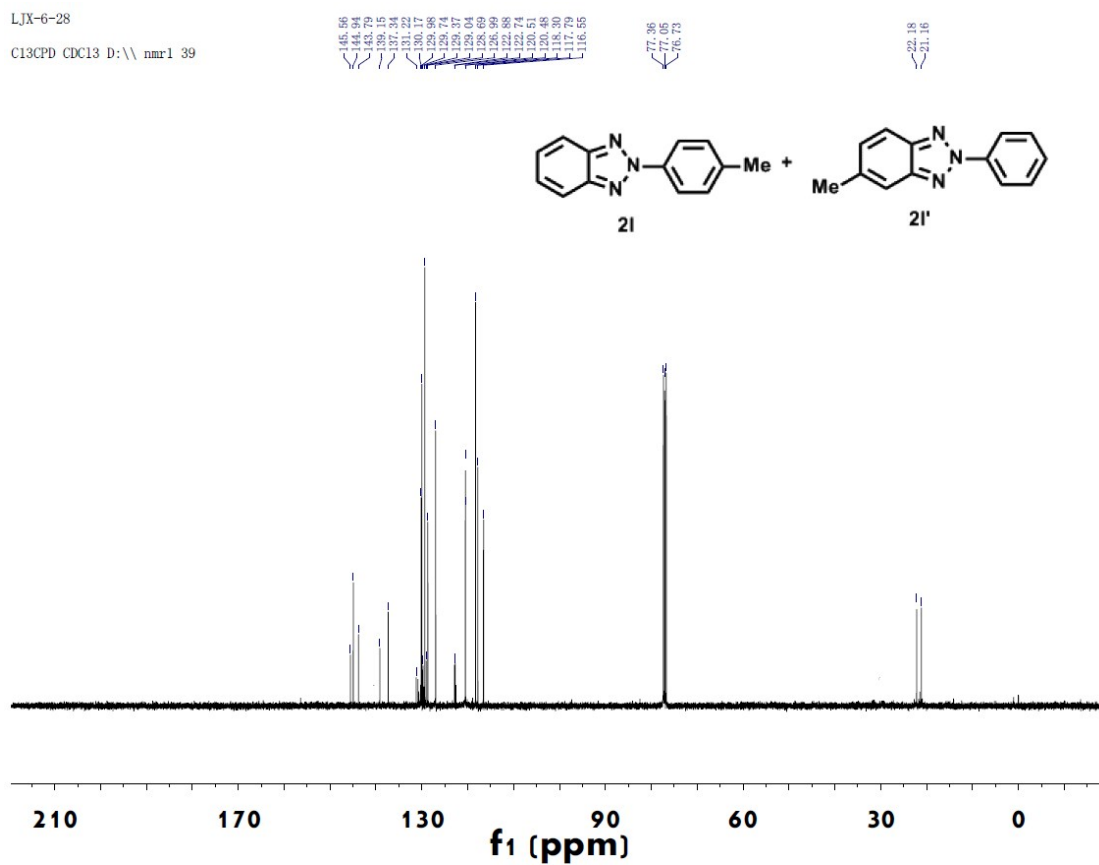

LJX-5-80-2

PROTON CDC13 D:\ nmr1 28

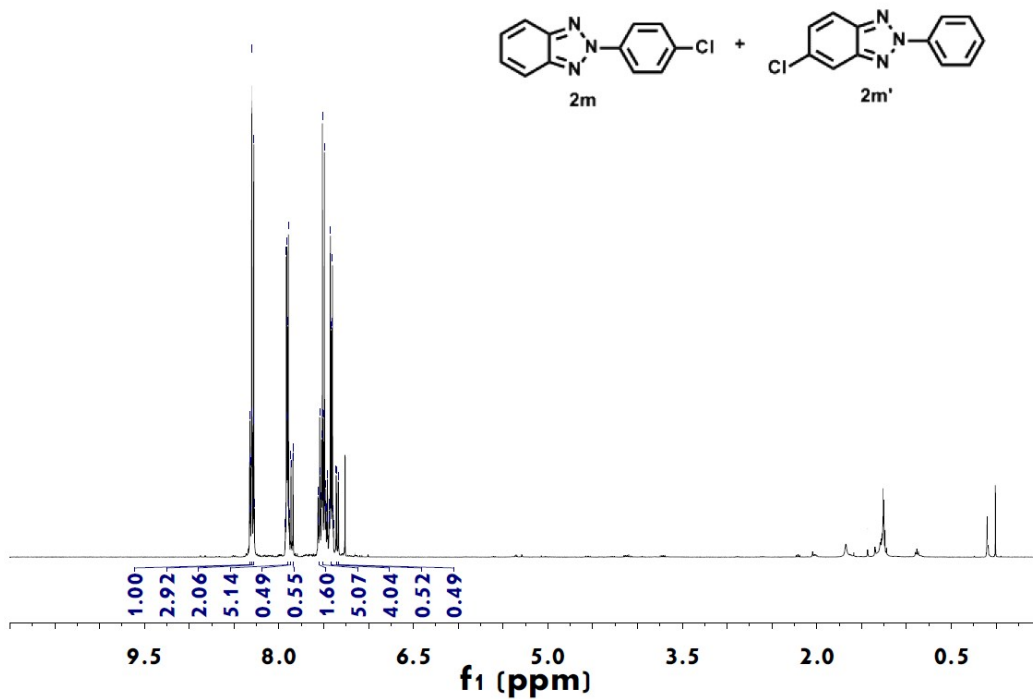

LJX-5-80-2

C13CPD CDC13 D:\ nmr1 28

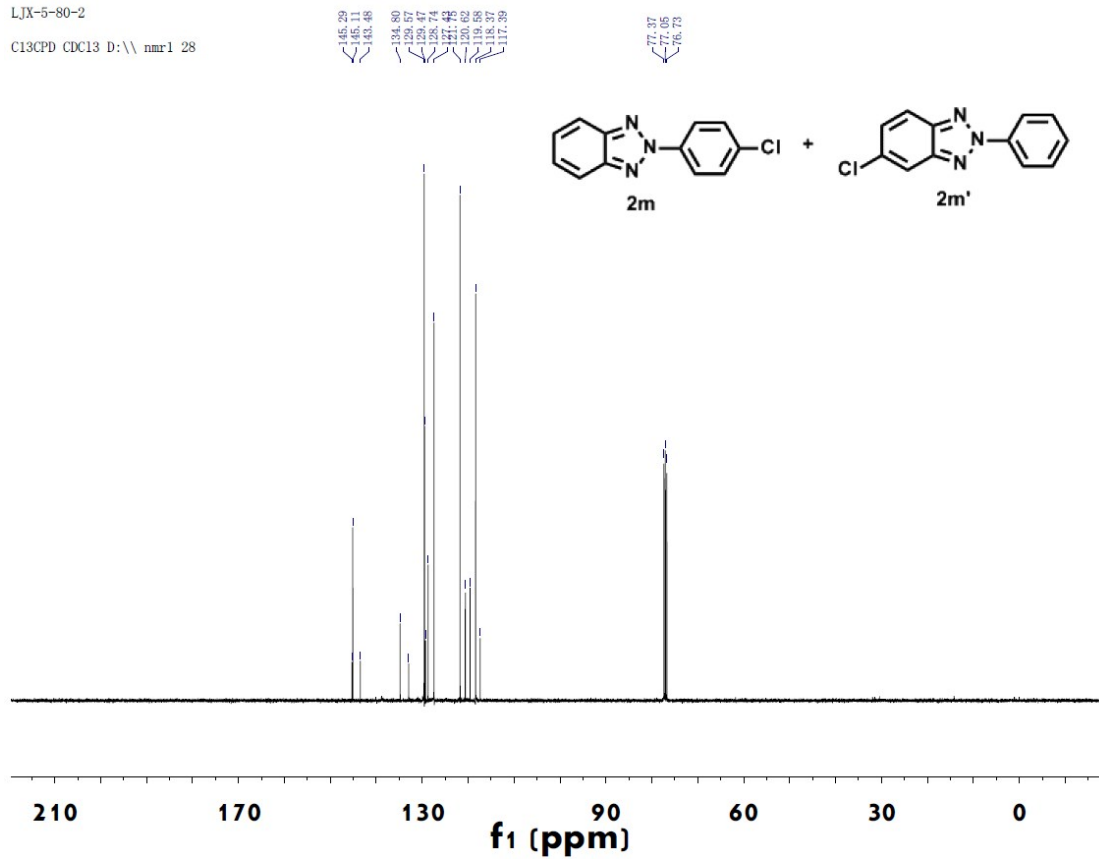

LJX-5-83-4

PROTON CDC13 D:\ nmr1 25

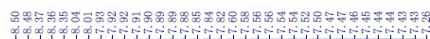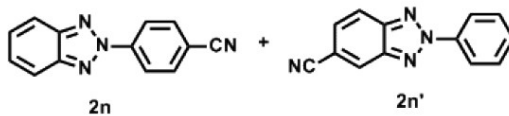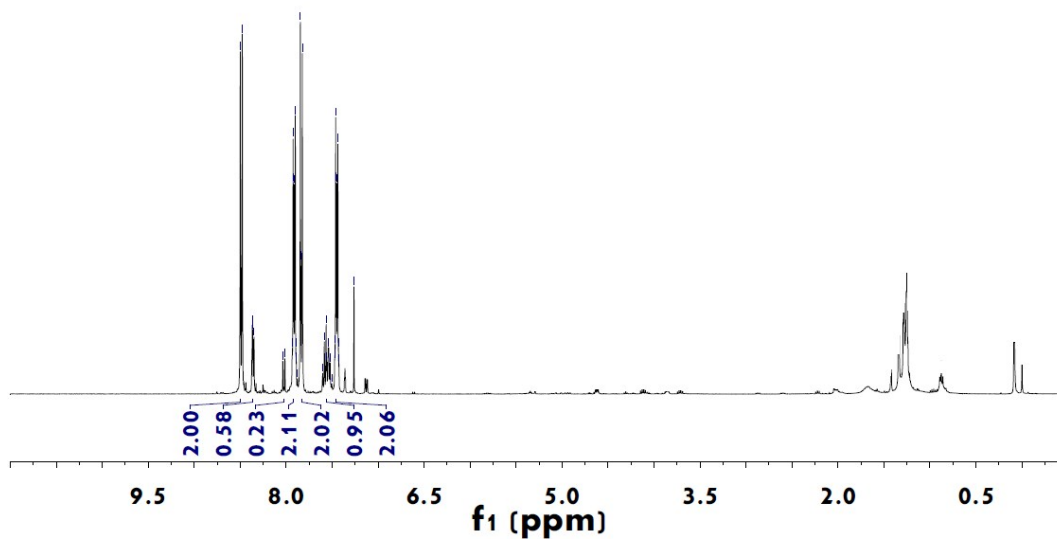

LJX-5-83-4

C13CPD CDC13 D:\ nmr1 27

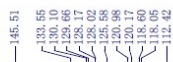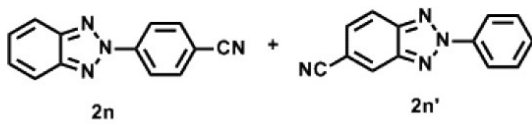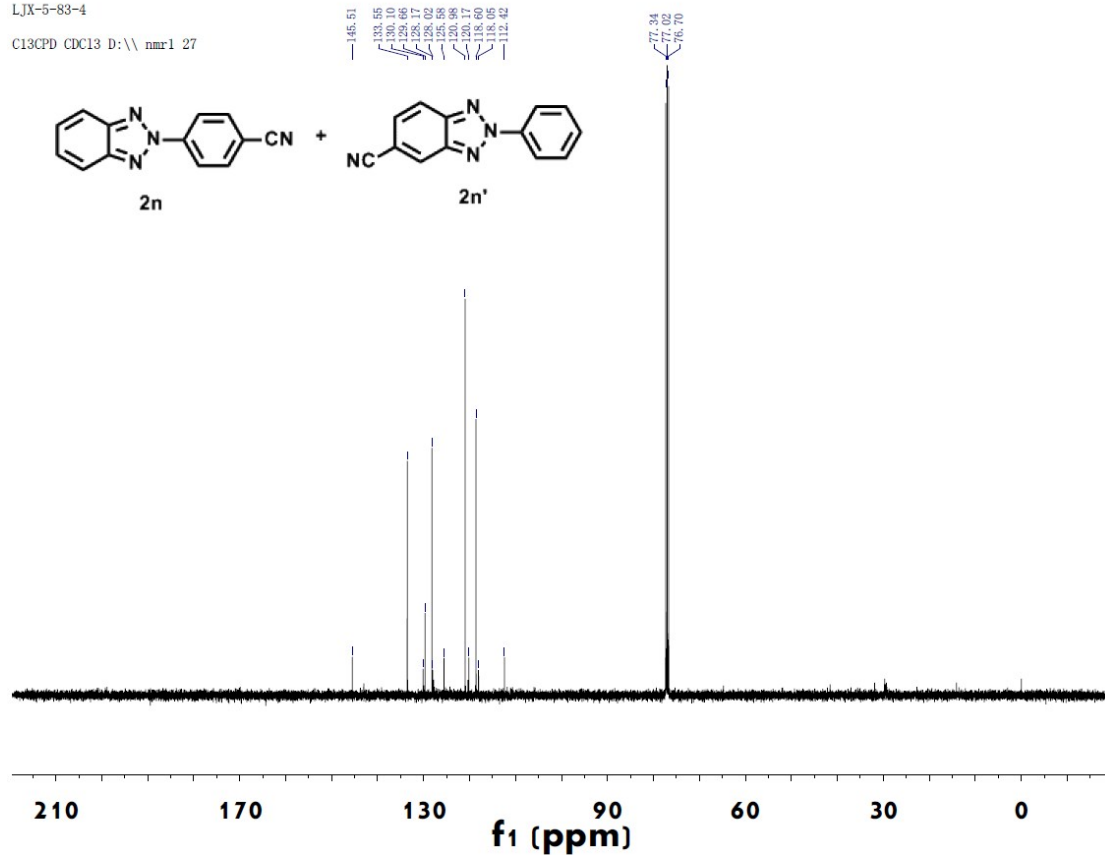



LJX-5-86-3  
PROTON CDC13 D:\ nmr1 25

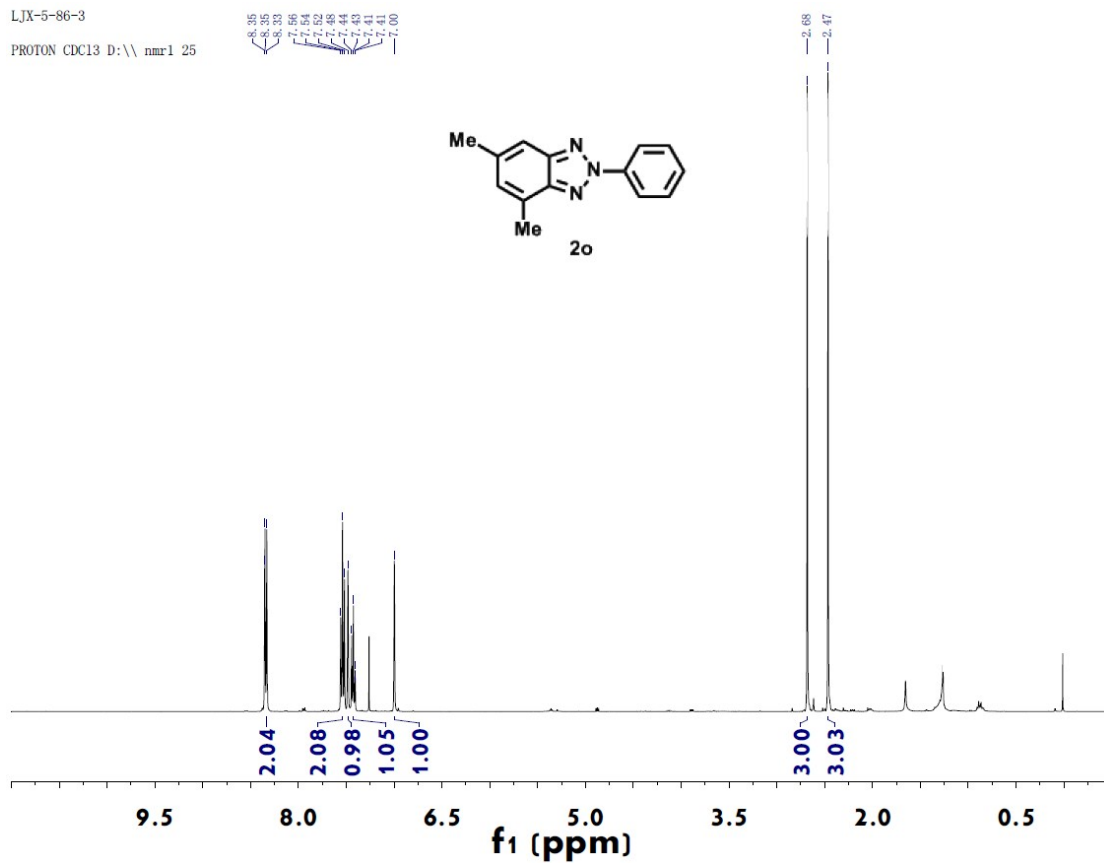

LJX-5-86-3  
C13CPD CDC13 D:\ nmr1 25

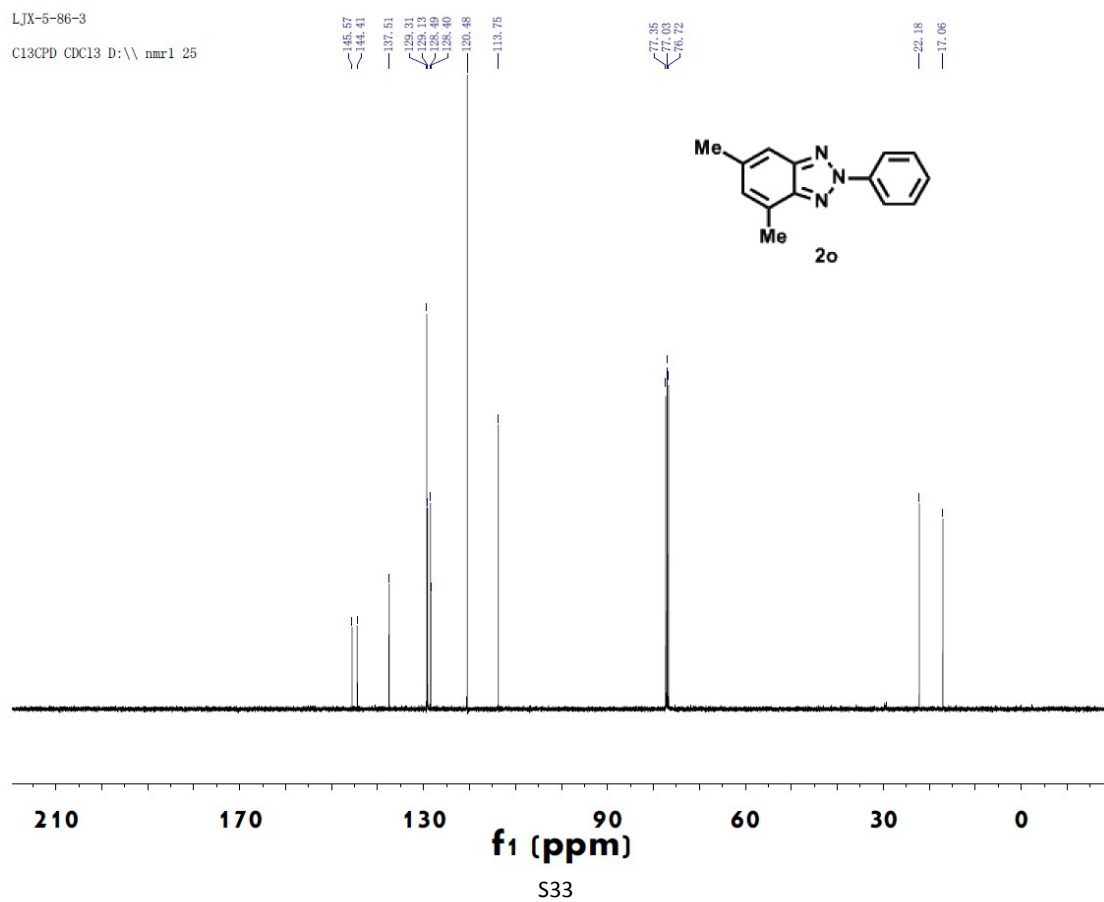

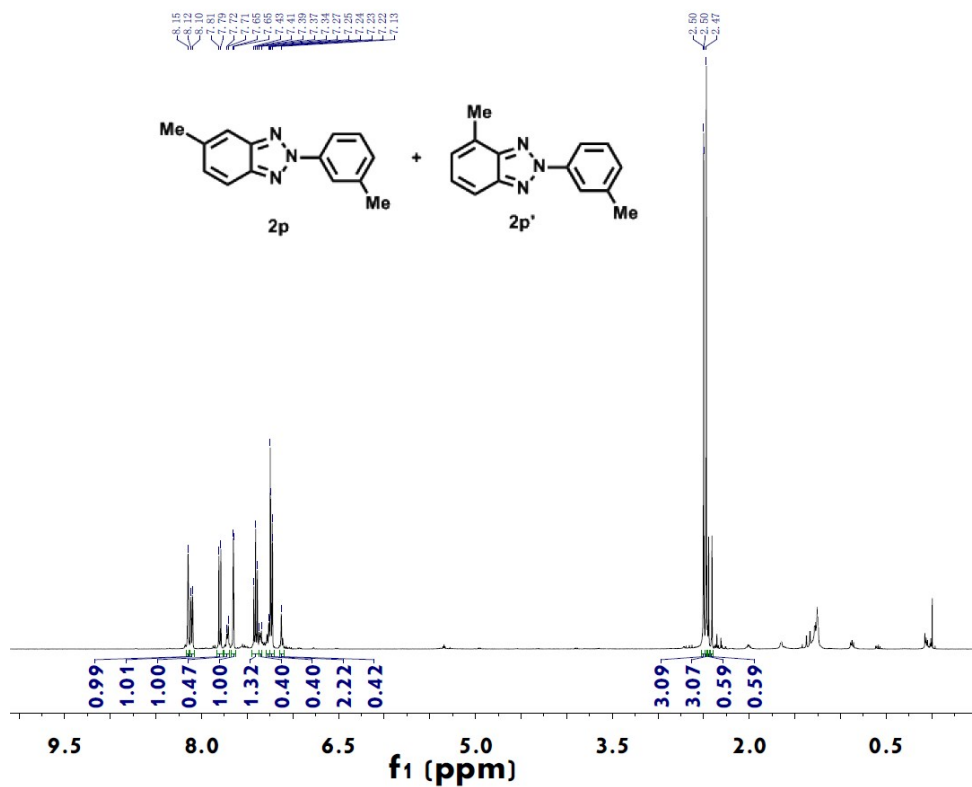

LJX-5-70

C13CPD CDCl3 D:\n nmr1 34

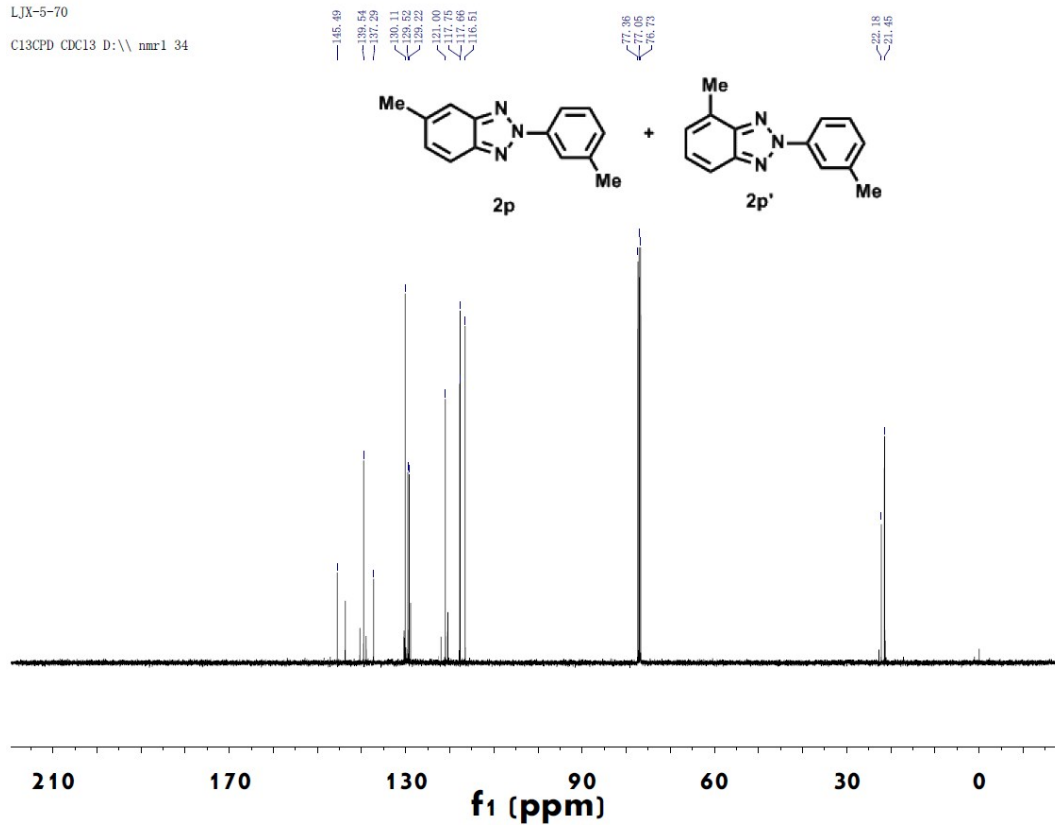

ljx-6-78-1-cdc13-1h

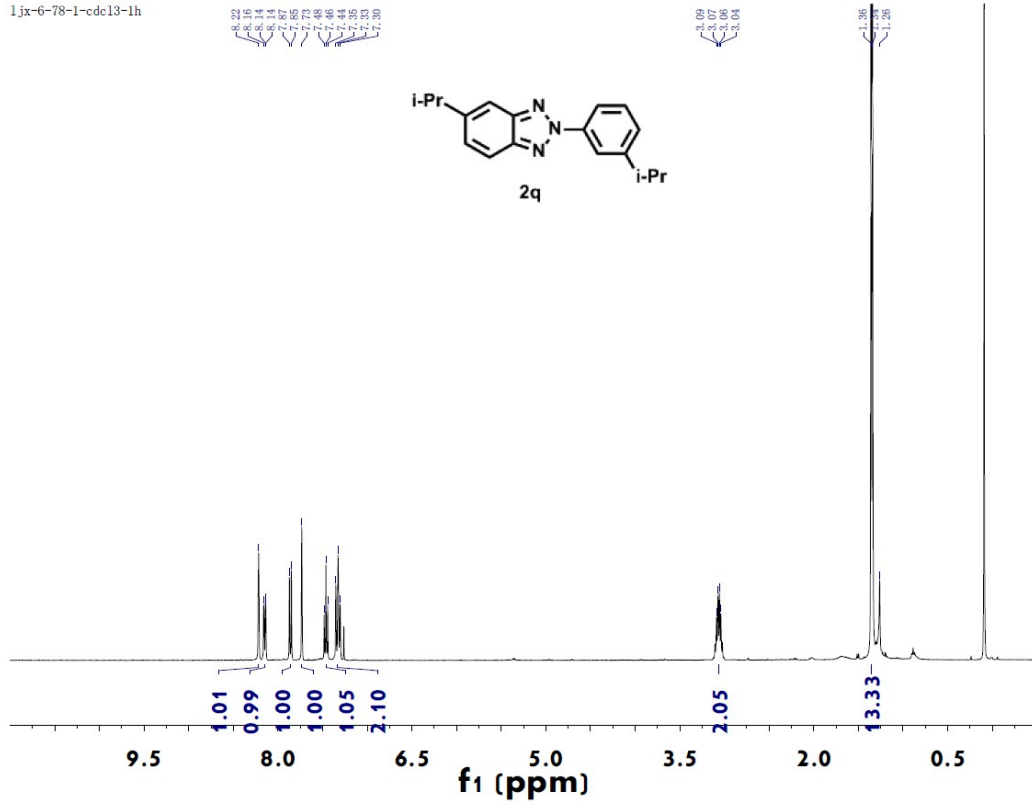

ljx-6-78-1-cdc13-1h

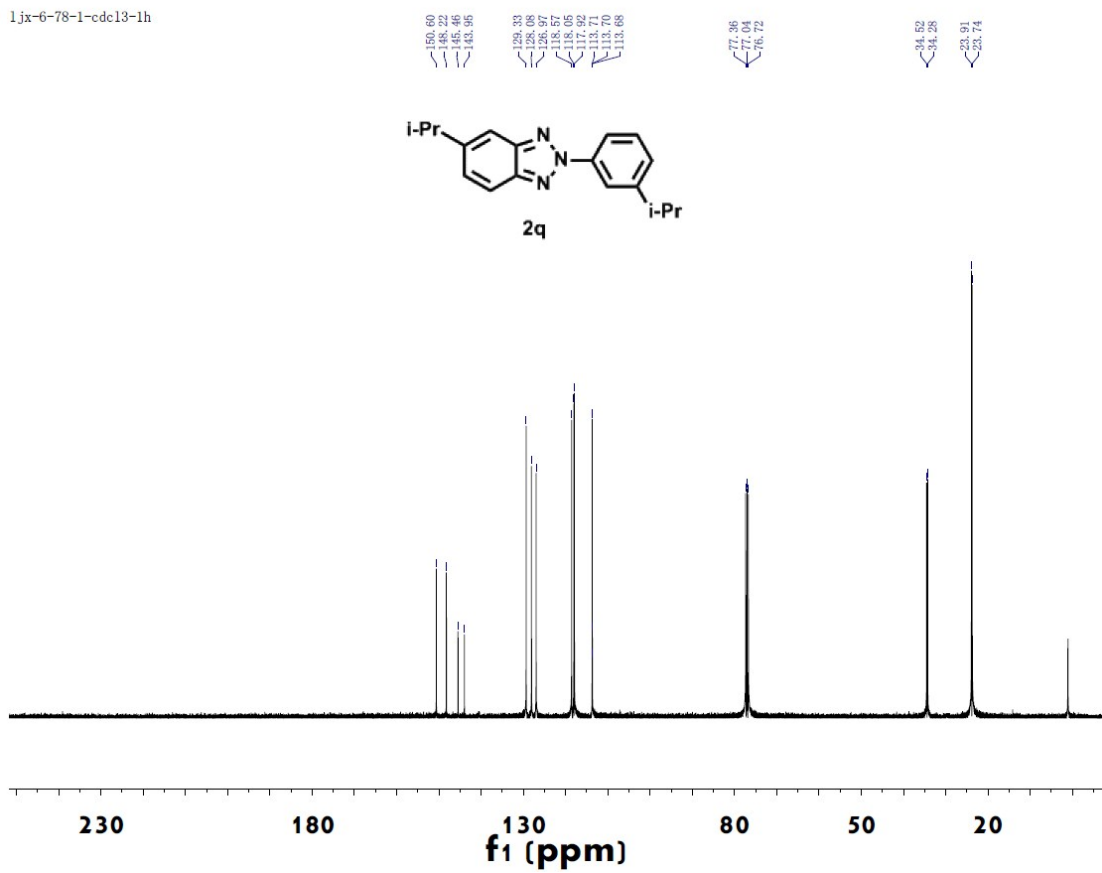

# GC-Mass of 2a' [-N<sup>15</sup>]

D:\Data\LJX\LJX-5-89-1.qgd

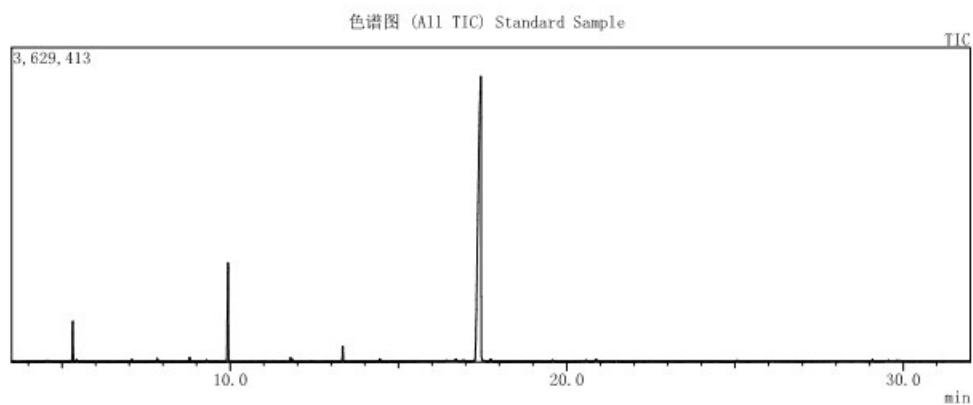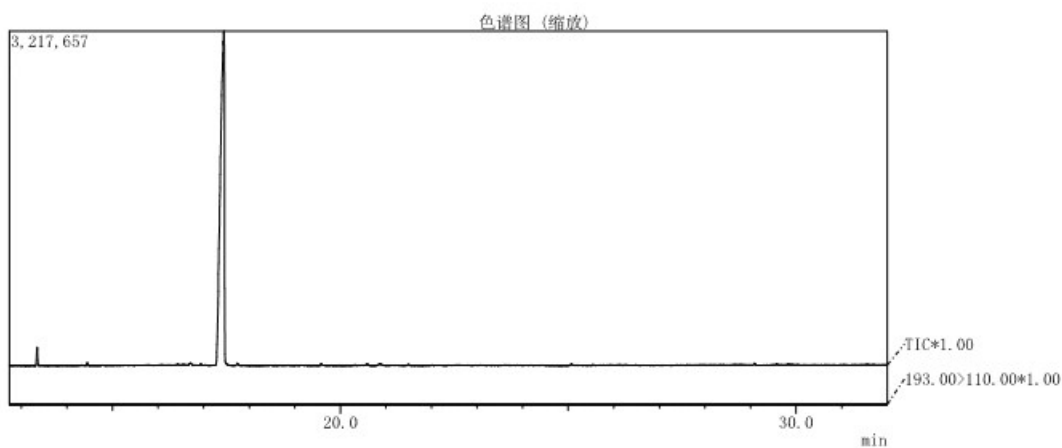

质谱

流路号:1 保留时间:17.420(扫描数:2785)  
质量峰:451  
原始模式:单个 17.420(2785) 基峰:196.15(786475)  
背景模式:无 组1-事件1 Scan

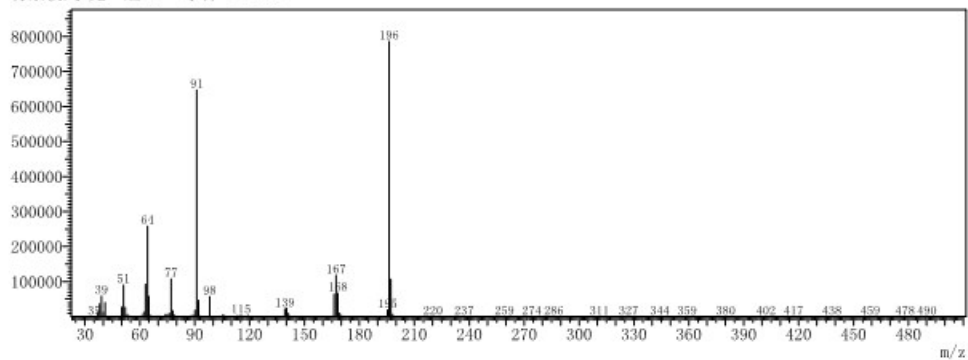

Supplement: c6cc04341k1.pdf [file c6cc04341k1.pdf]
